# Supplementary material for: Genome-Wide Maps of Circulating miRNA Biomarkers for Ulcerative Colitis
Source: PLoS One. 2012 Feb 16;7(2):e31241. doi: 10.1371/journal.pone.0031241 (PMC3281076; doi:10.1371/journal.pone.0031241)
Supplement: Table S1 — Lists of differentially expressed miRNAs identified by SAM from the entire dataset of platelets, PBMC and micro-vesicular fractions at an FDR of 1%. The “Score” represents the modified t-test statistics calculated by SAM. The “Fold Change” denotes the ratios of the mean intensity in patient samples over control samples. The q-value represents an estimate of FDR. This number is typically greater than 0. In our dataset due to the limiting sample size (20 cases and 20 controls) we observe for some features the test statistic to be more extreme than all observed in permutations. Therefore the estimated FDR for declaring that feature to be significant is set to 0. (XLSX) [file pone.0031241.s008.xlsx]

## Sheet: Platelet
Table S1.	List of differentially expressed miRNAs identified by SAM from platelet fraction.
	miRNA	Score(d)	Fold Change	q-value(%)	Status	Fraction
1	hsa-miR-500_st	4.50824	1.99297	0	upregulated	Platelets
2	hsa-miR-378-star_st	4.44835	1.95551	0	upregulated	Platelets
3	hsa-miR-501-5p_st	4.31135	1.9473	0	upregulated	Platelets
4	hsa-miR-941_st	3.94035	2.0314	0	upregulated	Platelets
5	hsa-miR-378_st	3.92278	1.66074	0	upregulated	Platelets
6	hsa-miR-550-star_st	3.66182	1.98951	0	upregulated	Platelets
7	hsa-miR-146b-3p_st	3.6461	1.89643	0	upregulated	Platelets
8	hsa-miR-27a-star_st	3.47426	2.46781	0	upregulated	Platelets
9	hsa-miR-188-5p_st	3.4016	1.84322	0	upregulated	Platelets
10	hsa-miR-720_st	3.32802	2.29213	0	upregulated	Platelets
11	hsa-miR-362-5p_st	3.31119	1.54452	0	upregulated	Platelets
12	hsa-miR-874_st	3.24797	1.84517	0	upregulated	Platelets
13	hsa-miR-532-5p_st	3.03187	1.45322	0	upregulated	Platelets
14	hsa-miR-138_st	3.02395	1.87944	0	upregulated	Platelets
15	hsa-miR-92a-1-star_st	3.01723	1.58377	0	upregulated	Platelets
16	hsa-miR-1274b_st	2.96499	1.85492	0	upregulated	Platelets
17	hsa-miR-181b_st	2.93125	1.48132	0	upregulated	Platelets
18	hsa-miR-769-3p_st	2.87165	1.92921	0	upregulated	Platelets
19	hsa-miR-769-5p_st	2.83108	1.67767	0	upregulated	Platelets
20	hsa-miR-143-star_st	2.7249	1.94531	0	upregulated	Platelets
21	hsa-miR-22_st	2.63763	1.48093	0	upregulated	Platelets
22	hsa-miR-422a_st	2.5868	1.57041	0	upregulated	Platelets
23	hsa-miR-330-3p_st	2.58212	1.49506	0	upregulated	Platelets
24	hsa-miR-20b-star_st	2.53809	1.50496	0	upregulated	Platelets
25	hsa-miR-1296_st	2.53468	1.65774	0	upregulated	Platelets
26	hsa-miR-150-star_st	2.52671	1.57588	0	upregulated	Platelets
27	hsa-miR-31_st	2.50156	1.87071	0	upregulated	Platelets
28	hsa-miR-140-3p_st	2.47095	1.3235	0	upregulated	Platelets
29	hsa-let-7i-star_st	2.43488	1.71088	0	upregulated	Platelets
30	hsa-miR-345_st	2.40387	1.41133	0	upregulated	Platelets
31	hsa-miR-1271_st	2.37014	1.41217	0	upregulated	Platelets
32	hsa-miR-181a-star_st	2.33424	1.52508	0	upregulated	Platelets
33	hsa-miR-363-star_st	2.3123	1.42806	0	upregulated	Platelets
34	hsa-miR-423-3p_st	2.29339	1.29488	0	upregulated	Platelets
35	hsa-miR-636_st	2.28041	1.5772	0	upregulated	Platelets
36	hsa-miR-25-star_st	2.27823	1.34253	0	upregulated	Platelets
37	hsa-miR-339-3p_st	2.2432	1.34716	0	upregulated	Platelets
38	hsa-miR-1280_st	2.21614	1.90926	0	upregulated	Platelets
39	hsa-miR-361-3p_st	2.21414	1.50421	0	upregulated	Platelets
40	hsa-miR-34a_st	2.15087	1.58828	0	upregulated	Platelets
41	hsa-miR-193b_st	2.15036	1.77805	0	upregulated	Platelets
42	hsa-miR-629-star_st	2.14496	1.41873	0	upregulated	Platelets
43	hsa-miR-1287_st	2.13119	1.50731	0	upregulated	Platelets
44	hsa-miR-194_st	2.11299	1.28028	0	upregulated	Platelets
45	hsa-miR-181a_st	2.0737	1.26175	0	upregulated	Platelets
46	hsa-miR-509-3p_st	2.07055	1.6148	0	upregulated	Platelets
47	hsa-miR-93-star_st	2.04809	1.33082	0	upregulated	Platelets
48	hsa-miR-671-3p_st	2.03363	1.54672	0	upregulated	Platelets
49	hsa-miR-98_st	-3.14092	0.53067	0	downregulated	Platelets
50	hsa-miR-335_st	-3.07526	0.536961	0	downregulated	Platelets
51	hsa-miR-374b_st	-2.64878	0.625443	1.27684	downregulated	Platelets
52	hsa-let-7f_st	-2.60578	0.720433	1.27684	downregulated	Platelets

## Sheet: microvesicles
Table S1.	List of differentially expressed miRNAs identified by SAM from micro-vesicular fraction.
	miRNA	Score(d)	Fold Change	q-value(%)	Status	Fraction
1	hsa-miR-1263_st	3.10119	2.08224	0	upregulated	Microvesicles
2	hsa-miR-202_st	3.08667	1.69191	0	upregulated	Microvesicles
3	hsa-miR-628-5p_st	2.96948	1.72093	0	upregulated	Microvesicles
4	hsa-miR-603_st	2.92367	1.7033	0	upregulated	Microvesicles
5	hsa-miR-221-star_st	2.8477	1.66562	0	upregulated	Microvesicles
6	hsa-miR-455-3p_st	2.76281	2.09523	0	upregulated	Microvesicles
7	hsa-miR-570_st	2.66214	1.69989	0	upregulated	Microvesicles
8	hsa-miR-34b-star_st	2.38981	1.33545	0	upregulated	Microvesicles
9	hsa-miR-548c-3p_st	2.37094	1.26899	0	upregulated	Microvesicles
10	hsa-miR-635_st	2.35321	1.44492	0	upregulated	Microvesicles
11	hsa-miR-25-star_st	2.28761	1.39795	0	upregulated	Microvesicles

## Sheet: PBMC
Table S1.	List of differentially expressed miRNAs identified by SAM from PBMC fraction.
	miRNA	Score(d)	Fold Change	q-value(%)	Status	Fraction
1	hsa-miR-200a_st	-2.39184	0.725566	0	downregulated	PBMC
2	hsa-miR-516a-5p_st	-2.36378	0.767446	0	downregulated	PBMC
3	hsa-miR-30e_st	-2.28807	0.631929	0	downregulated	PBMC
4	hsa-let-7i-star_st	-2.27937	0.78411	0	downregulated	PBMC
5	hsa-miR-17-star_st	-2.21313	0.768074	0	downregulated	PBMC
6	hsa-miR-138_st	-2.09781	0.664669	0	downregulated	PBMC
