# Supplementary material for: Genome-Wide Maps of Circulating miRNA Biomarkers for Ulcerative Colitis
Source: PLoS One. 2012 Feb 16;7(2):e31241. doi: 10.1371/journal.pone.0031241 (PMC3281076; doi:10.1371/journal.pone.0031241)
Supplement: Table S3 — List of 6 biomarkers derived from the micro-vesicle fractions. (XLSX) [file pone.0031241.s010.xlsx]

## Sheet: TableS-SAM-biomarkers-mv
Table S3 : Microvesicle Specific Biomarkers
miRNA	Score.d.	Fold.Change
hsa-miR-628-5p_st	2.96948	1.72093
hsa-miR-603_st	2.92367	1.7033
hsa-miR-202_st	3.08667	1.69191
hsa-miR-1263_st	3.10119	2.08224
hsa-miR-221-star_st	2.8477	1.66562
hsa-miR-455-3p_st	2.76281	2.09523
The “Score” represents the modified t-test statistics calculated by SAM. The “Fold Change” denotes the ratios of the mean intensity in patient samples over control samples.
