# Supplementary material for: Genome-Wide Maps of Circulating miRNA Biomarkers for Ulcerative Colitis
Source: PLoS One. 2012 Feb 16;7(2):e31241. doi: 10.1371/journal.pone.0031241 (PMC3281076; doi:10.1371/journal.pone.0031241)
Supplement: Table S4 — List of 29 biomarkers derived from a combination of platelets and micro-vesicular fraction. (XLSX) [file pone.0031241.s011.xlsx]

## Sheet: TableS-SAM-biomarkers-PlatMV
Table S4 : Biomarkers from combined analysis of Platelet and Micro-vesicle fractions
Gene.ID	Score.d.	Fold.Change
mv-hsa-miR-202_st	2.86678	1.69191
pl-hsa-miR-941_st	4.27329	2.0314
pl-hsa-miR-92a-1-star_st	3.32278	1.58377
pl-hsa-miR-874_st	3.50867	1.84517
pl-hsa-miR-769-5p_st	3.06619	1.67767
pl-hsa-miR-720_st	3.52628	2.29213
pl-hsa-miR-550-star_st	3.95701	1.98951
pl-hsa-miR-532-5p_st	3.4207	1.45322
pl-hsa-miR-501-5p_st	4.74117	1.9473
pl-hsa-miR-500_st	4.9629	1.99297
pl-hsa-miR-378_st	4.39957	1.66074
pl-hsa-miR-378-star_st	4.9042	1.95551
pl-hsa-miR-362-5p_st	3.70687	1.54452
pl-hsa-miR-27a-star_st	3.67218	2.46781
pl-hsa-miR-22_st	2.91171	1.48093
pl-hsa-miR-188-5p_st	3.68918	1.84322
pl-hsa-miR-181b_st	3.27345	1.48132
pl-hsa-miR-146b-3p_st	3.96246	1.89643
pl-hsa-miR-138_st	3.24166	1.87944
pl-hsa-miR-1274b_st	3.17876	1.85492
mv-hsa-miR-1263_st	2.93882	2.08224
pl-hsa-miR-769-3p_st	3.05898	1.92921
pl-hsa-miR-140-3p_st	2.81925	1.3235
pl-hsa-miR-330-3p_st	2.83741	1.49506
pl-hsa-miR-422a_st	2.81271	1.57041
pl-hsa-miR-20b-star_st	2.77998	1.50496
pl-hsa-miR-143-star_st	2.89079	1.94531
pl-hsa-miR-423-3p_st	2.61911	1.29488
pl-hsa-miR-150-star_st	2.74003	1.57588
pl- refers to biomarkers of platelet origin
mv - refers to biomarkers of microvesicular origin
The “Score” represents the modified t-test statistics calculated by SAM. The “Fold Change” denotes the ratios of the mean intensity in patient samples over control samples.
