# Supplementary material for: Genome-Wide Maps of Circulating miRNA Biomarkers for Ulcerative Colitis
Source: PLoS One. 2012 Feb 16;7(2):e31241. doi: 10.1371/journal.pone.0031241 (PMC3281076; doi:10.1371/journal.pone.0031241)
Supplement: Table S6 — List of predicted mRNA targets of the 31 biomarkers identified by TargetScan and DIANA. (XLS) [file pone.0031241.s013.xls]

## Sheet: Sheet1
Table S6. Entrez Gene IDs of the predicted targets of the platelet derived biomarkers obtained from TargetScan 5.0 and DIANA.
miRNA biomarkers	Target Gene.ID
hsa-miR-1271	9625
hsa-miR-1271	18
hsa-miR-1271	19
hsa-miR-1271	20
hsa-miR-1271	215
hsa-miR-1271	215
hsa-miR-1271	36
hsa-miR-1271	90
hsa-miR-1271	93
hsa-miR-1271	8728
hsa-miR-1271	170692
hsa-miR-1271	134637
hsa-miR-1271	112
hsa-miR-1271	112
hsa-miR-1271	112
hsa-miR-1271	112
hsa-miR-1271	152
hsa-miR-1271	121536
hsa-miR-1271	10768
hsa-miR-1271	196
hsa-miR-1271	150209
hsa-miR-1271	55966
hsa-miR-1271	50808
hsa-miR-1271	79796
hsa-miR-1271	238
hsa-miR-1271	150864
hsa-miR-1271	51421
hsa-miR-1271	54467
hsa-miR-1271	84079
hsa-miR-1271	283373
hsa-miR-1271	311
hsa-miR-1271	130340
hsa-miR-1271	163
hsa-miR-1271	26985
hsa-miR-1271	23431
hsa-miR-1271	321
hsa-miR-1271	26060
hsa-miR-1271	372
hsa-miR-1271	83478
hsa-miR-1271	9411
hsa-miR-1271	395
hsa-miR-1271	23365
hsa-miR-1271	23365
hsa-miR-1271	50650
hsa-miR-1271	8874
hsa-miR-1271	5926
hsa-miR-1271	84159
hsa-miR-1271	10123
hsa-miR-1271	84517
hsa-miR-1271	10776
hsa-miR-1271	57561
hsa-miR-1271	79642
hsa-miR-1271	340485
hsa-miR-1271	55870
hsa-miR-1271	460
hsa-miR-1271	55054
hsa-miR-1271	79065
hsa-miR-1271	79065
hsa-miR-1271	84913
hsa-miR-1271	493
hsa-miR-1271	10396
hsa-miR-1271	10079
hsa-miR-1271	6310
hsa-miR-1271	6310
hsa-miR-1271	10677
hsa-miR-1271	64651
hsa-miR-1271	8707
hsa-miR-1271	2583
hsa-miR-1271	2583
hsa-miR-1271	60468
hsa-miR-1271	60468
hsa-miR-1271	577
hsa-miR-1271	10409
hsa-miR-1271	587
hsa-miR-1271	53335
hsa-miR-1271	596
hsa-miR-1271	613
hsa-miR-1271	27319
hsa-miR-1271	23299
hsa-miR-1271	658
hsa-miR-1271	54796
hsa-miR-1271	54796
hsa-miR-1271	54796
hsa-miR-1271	54796
hsa-miR-1271	27154
hsa-miR-1271	27154
hsa-miR-1271	60677
hsa-miR-1271	54014
hsa-miR-1271	55108
hsa-miR-1271	112939
hsa-miR-1271	79892
hsa-miR-1271	29902
hsa-miR-1271	55668
hsa-miR-1271	80262
hsa-miR-1271	79018
hsa-miR-1271	55731
hsa-miR-1271	753
hsa-miR-1271	84886
hsa-miR-1271	149466
hsa-miR-1271	25943
hsa-miR-1271	165679
hsa-miR-1271	90355
hsa-miR-1271	64771
hsa-miR-1271	79969
hsa-miR-1271	222166
hsa-miR-1271	55069
hsa-miR-1271	23731
hsa-miR-1271	58493
hsa-miR-1271	91768
hsa-miR-1271	775
hsa-miR-1271	9254
hsa-miR-1271	9254
hsa-miR-1271	782
hsa-miR-1271	782
hsa-miR-1271	785
hsa-miR-1271	253559
hsa-miR-1271	799
hsa-miR-1271	55450
hsa-miR-1271	10645
hsa-miR-1271	23261
hsa-miR-1271	826
hsa-miR-1271	835
hsa-miR-1271	863
hsa-miR-1271	863
hsa-miR-1271	643866
hsa-miR-1271	84733
hsa-miR-1271	23466
hsa-miR-1271	51134
hsa-miR-1271	440193
hsa-miR-1271	80212
hsa-miR-1271	595
hsa-miR-1271	894
hsa-miR-1271	900
hsa-miR-1271	54619
hsa-miR-1271	8763
hsa-miR-1271	8763
hsa-miR-1271	8476
hsa-miR-1271	9578
hsa-miR-1271	55561
hsa-miR-1271	8941
hsa-miR-1271	55573
hsa-miR-1271	9620
hsa-miR-1271	1952
hsa-miR-1271	401541
hsa-miR-1271	9859
hsa-miR-1271	1072
hsa-miR-1271	51287
hsa-miR-1271	53344
hsa-miR-1271	25978
hsa-miR-1271	29082
hsa-miR-1271	8534
hsa-miR-1271	9486
hsa-miR-1271	1184
hsa-miR-1271	1184
hsa-miR-1271	53405
hsa-miR-1271	9575
hsa-miR-1271	81037
hsa-miR-1271	112616
hsa-miR-1271	54805
hsa-miR-1271	26505
hsa-miR-1271	246175
hsa-miR-1271	246175
hsa-miR-1271	26047
hsa-miR-1271	23242
hsa-miR-1271	83548
hsa-miR-1271	1305
hsa-miR-1271	1289
hsa-miR-1271	23603
hsa-miR-1271	64506
hsa-miR-1271	80315
hsa-miR-1271	11052
hsa-miR-1271	64764
hsa-miR-1271	1399
hsa-miR-1271	9150
hsa-miR-1271	58190
hsa-miR-1271	58190
hsa-miR-1271	58190
hsa-miR-1271	10106
hsa-miR-1271	10217
hsa-miR-1271	1500
hsa-miR-1271	1508
hsa-miR-1271	2017
hsa-miR-1271	2017
hsa-miR-1271	10658
hsa-miR-1271	10659
hsa-miR-1271	8451
hsa-miR-1271	27065
hsa-miR-1271	64858
hsa-miR-1271	1641
hsa-miR-1271	23576
hsa-miR-1271	1649
hsa-miR-1271	163259
hsa-miR-1271	8562
hsa-miR-1271	55635
hsa-miR-1271	51009
hsa-miR-1271	28955
hsa-miR-1271	9993
hsa-miR-1271	1718
hsa-miR-1271	1730
hsa-miR-1271	85458
hsa-miR-1271	1737
hsa-miR-1271	220107
hsa-miR-1271	9228
hsa-miR-1271	1793
hsa-miR-1271	9732
hsa-miR-1271	55715
hsa-miR-1271	147991
hsa-miR-1271	51514
hsa-miR-1271	56940
hsa-miR-1271	1875
hsa-miR-1271	1879
hsa-miR-1271	253738
hsa-miR-1271	253738
hsa-miR-1271	9718
hsa-miR-1271	9695
hsa-miR-1271	80267
hsa-miR-1271	1909
hsa-miR-1271	8411
hsa-miR-1271	1946
hsa-miR-1271	1948
hsa-miR-1271	1960
hsa-miR-1271	26523
hsa-miR-1271	1965
hsa-miR-1271	8669
hsa-miR-1271	1979
hsa-miR-1271	1983
hsa-miR-1271	1983
hsa-miR-1271	1994
hsa-miR-1271	1993
hsa-miR-1271	8178
hsa-miR-1271	22936
hsa-miR-1271	9844
hsa-miR-1271	8320
hsa-miR-1271	8320
hsa-miR-1271	2034
hsa-miR-1271	23136
hsa-miR-1271	54566
hsa-miR-1271	2042
hsa-miR-1271	2066
hsa-miR-1271	26059
hsa-miR-1271	10613
hsa-miR-1271	30001
hsa-miR-1271	2104
hsa-miR-1271	55224
hsa-miR-1271	7813
hsa-miR-1271	115704
hsa-miR-1271	7430
hsa-miR-1271	2162
hsa-miR-1271	90362
hsa-miR-1271	201627
hsa-miR-1271	55007
hsa-miR-1271	10144
hsa-miR-1271	221061
hsa-miR-1271	55719
hsa-miR-1271	131583
hsa-miR-1271	51571
hsa-miR-1271	51307
hsa-miR-1271	79850
hsa-miR-1271	57795
hsa-miR-1271	58516
hsa-miR-1271	23344
hsa-miR-1271	286336
hsa-miR-1271	284716
hsa-miR-1271	145773
hsa-miR-1271	51439
hsa-miR-1271	10160
hsa-miR-1271	120114
hsa-miR-1271	254170
hsa-miR-1271	150726
hsa-miR-1271	23291
hsa-miR-1271	56929
hsa-miR-1271	2254
hsa-miR-1271	79869
hsa-miR-1271	441027
hsa-miR-1271	2332
hsa-miR-1271	2335
hsa-miR-1271	2295
hsa-miR-1271	2295
hsa-miR-1271	3607
hsa-miR-1271	1112
hsa-miR-1271	1112
hsa-miR-1271	2308
hsa-miR-1271	2309
hsa-miR-1271	2309
hsa-miR-1271	4303
hsa-miR-1271	93986
hsa-miR-1271	94234
hsa-miR-1271	80020
hsa-miR-1271	2475
hsa-miR-1271	55691
hsa-miR-1271	9758
hsa-miR-1271	10818
hsa-miR-1271	10818
hsa-miR-1271	10818
hsa-miR-1271	10818
hsa-miR-1271	10690
hsa-miR-1271	8087
hsa-miR-1271	79443
hsa-miR-1271	2534
hsa-miR-1271	2590
hsa-miR-1271	8139
hsa-miR-1271	23108
hsa-miR-1271	2650
hsa-miR-1271	23062
hsa-miR-1271	9815
hsa-miR-1271	2700
hsa-miR-1271	10052
hsa-miR-1271	2733
hsa-miR-1271	283464
hsa-miR-1271	283464
hsa-miR-1271	2773
hsa-miR-1271	2775
hsa-miR-1271	2775
hsa-miR-1271	2776
hsa-miR-1271	10020
hsa-miR-1271	2817
hsa-miR-1271	2719
hsa-miR-1271	10243
hsa-miR-1271	2823
hsa-miR-1271	2824
hsa-miR-1271	25960
hsa-miR-1271	54329
hsa-miR-1271	114928
hsa-miR-1271	51704
hsa-miR-1271	2885
hsa-miR-1271	79977
hsa-miR-1271	2890
hsa-miR-1271	2894
hsa-miR-1271	2870
hsa-miR-1271	2870
hsa-miR-1271	2911
hsa-miR-1271	2917
hsa-miR-1271	9567
hsa-miR-1271	1839
hsa-miR-1271	646227
hsa-miR-1271	51564
hsa-miR-1271	3280
hsa-miR-1271	55662
hsa-miR-1271	51617
hsa-miR-1271	90861
hsa-miR-1271	84376
hsa-miR-1271	6782
hsa-miR-1271	3306
hsa-miR-1271	3480
hsa-miR-1271	3480
hsa-miR-1271	10642
hsa-miR-1271	10642
hsa-miR-1271	152404
hsa-miR-1271	3321
hsa-miR-1271	9118
hsa-miR-1271	3632
hsa-miR-1271	51141
hsa-miR-1271	26512
hsa-miR-1271	55705
hsa-miR-1271	3667
hsa-miR-1271	3670
hsa-miR-1271	3708
hsa-miR-1271	3709
hsa-miR-1271	5927
hsa-miR-1271	221895
hsa-miR-1271	221037
hsa-miR-1271	221037
hsa-miR-1271	3770
hsa-miR-1271	57528
hsa-miR-1271	23510
hsa-miR-1271	154881
hsa-miR-1271	10945
hsa-miR-1271	23506
hsa-miR-1271	283638
hsa-miR-1271	283638
hsa-miR-1271	9870
hsa-miR-1271	56243
hsa-miR-1271	57535
hsa-miR-1271	222223
hsa-miR-1271	57624
hsa-miR-1271	57687
hsa-miR-1271	57687
hsa-miR-1271	205717
hsa-miR-1271	340533
hsa-miR-1271	340533
hsa-miR-1271	340533
hsa-miR-1271	124602
hsa-miR-1271	26153
hsa-miR-1271	3799
hsa-miR-1271	51621
hsa-miR-1271	51274
hsa-miR-1271	23276
hsa-miR-1271	11275
hsa-miR-1271	55975
hsa-miR-1271	57563
hsa-miR-1271	3839
hsa-miR-1271	3837
hsa-miR-1271	3845
hsa-miR-1271	3895
hsa-miR-1271	3897
hsa-miR-1271	3915
hsa-miR-1271	29956
hsa-miR-1271	84458
hsa-miR-1271	3936
hsa-miR-1271	11155
hsa-miR-1271	84247
hsa-miR-1271	9211
hsa-miR-1271	8022
hsa-miR-1271	9388
hsa-miR-1271	25802
hsa-miR-1271	114783
hsa-miR-1271	222484
hsa-miR-1271	153364
hsa-miR-1271	26010
hsa-miR-1271	283514
hsa-miR-1271	22859
hsa-miR-1271	23266
hsa-miR-1271	64748
hsa-miR-1271	9890
hsa-miR-1271	9890
hsa-miR-1271	57631
hsa-miR-1271	57631
hsa-miR-1271	57631
hsa-miR-1271	57631
hsa-miR-1271	26018
hsa-miR-1271	4040
hsa-miR-1271	81543
hsa-miR-1271	64101
hsa-miR-1271	57554
hsa-miR-1271	26065
hsa-miR-1271	7798
hsa-miR-1271	7798
hsa-miR-1271	10586
hsa-miR-1271	4094
hsa-miR-1271	54551
hsa-miR-1271	9223
hsa-miR-1271	260425
hsa-miR-1271	4117
hsa-miR-1271	114569
hsa-miR-1271	5604
hsa-miR-1271	5606
hsa-miR-1271	4215
hsa-miR-1271	257397
hsa-miR-1271	9448
hsa-miR-1271	93487
hsa-miR-1271	22919
hsa-miR-1271	115123
hsa-miR-1271	4154
hsa-miR-1271	4204
hsa-miR-1271	5469
hsa-miR-1271	5469
hsa-miR-1271	9282
hsa-miR-1271	4209
hsa-miR-1271	79828
hsa-miR-1271	4238
hsa-miR-1271	9258
hsa-miR-1271	84975
hsa-miR-1271	160518
hsa-miR-1271	54531
hsa-miR-1271	4286
hsa-miR-1271	57496
hsa-miR-1271	4297
hsa-miR-1271	4298
hsa-miR-1271	6945
hsa-miR-1271	326625
hsa-miR-1271	92597
hsa-miR-1271	10933
hsa-miR-1271	9643
hsa-miR-1271	158747
hsa-miR-1271	4354
hsa-miR-1271	22808
hsa-miR-1271	4478
hsa-miR-1271	4478
hsa-miR-1271	23788
hsa-miR-1271	4520
hsa-miR-1271	54545
hsa-miR-1271	8897
hsa-miR-1271	9788
hsa-miR-1271	91663
hsa-miR-1271	4602
hsa-miR-1271	23026
hsa-miR-1271	80179
hsa-miR-1271	4641
hsa-miR-1271	4642
hsa-miR-1271	4645
hsa-miR-1271	25924
hsa-miR-1271	11143
hsa-miR-1271	9683
hsa-miR-1271	51172
hsa-miR-1271	10135
hsa-miR-1271	340719
hsa-miR-1271	80218
hsa-miR-1271	89795
hsa-miR-1271	83988
hsa-miR-1271	4684
hsa-miR-1271	10397
hsa-miR-1271	3340
hsa-miR-1271	81831
hsa-miR-1271	58158
hsa-miR-1271	4763
hsa-miR-1271	4808
hsa-miR-1271	387921
hsa-miR-1271	123606
hsa-miR-1271	25836
hsa-miR-1271	57555
hsa-miR-1271	57555
hsa-miR-1271	57555
hsa-miR-1271	4857
hsa-miR-1271	4857
hsa-miR-1271	4884
hsa-miR-1271	4885
hsa-miR-1271	51299
hsa-miR-1271	51559
hsa-miR-1271	59277
hsa-miR-1271	9891
hsa-miR-1271	9891
hsa-miR-1271	57532
hsa-miR-1271	8650
hsa-miR-1271	10762
hsa-miR-1271	116150
hsa-miR-1271	26011
hsa-miR-1271	26011
hsa-miR-1271	4967
hsa-miR-1271	8473
hsa-miR-1271	9480
hsa-miR-1271	81285
hsa-miR-1271	114884
hsa-miR-1271	9885
hsa-miR-1271	51633
hsa-miR-1271	5017
hsa-miR-1271	9943
hsa-miR-1271	9943
hsa-miR-1271	10605
hsa-miR-1271	5058
hsa-miR-1271	5069
hsa-miR-1271	85315
hsa-miR-1271	5080
hsa-miR-1271	5089
hsa-miR-1271	5091
hsa-miR-1271	27328
hsa-miR-1271	83259
hsa-miR-1271	5100
hsa-miR-1271	84333
hsa-miR-1271	27445
hsa-miR-1271	5110
hsa-miR-1271	115294
hsa-miR-1271	22990
hsa-miR-1271	5129
hsa-miR-1271	27115
hsa-miR-1271	5156
hsa-miR-1271	23042
hsa-miR-1271	5209
hsa-miR-1271	5216
hsa-miR-1271	80055
hsa-miR-1271	80055
hsa-miR-1271	5229
hsa-miR-1271	65979
hsa-miR-1271	148479
hsa-miR-1271	23338
hsa-miR-1271	51105
hsa-miR-1271	51105
hsa-miR-1271	112885
hsa-miR-1271	23187
hsa-miR-1271	84457
hsa-miR-1271	55022
hsa-miR-1271	5286
hsa-miR-1271	5295
hsa-miR-1271	5586
hsa-miR-1271	5325
hsa-miR-1271	5332
hsa-miR-1271	5335
hsa-miR-1271	9842
hsa-miR-1271	5352
hsa-miR-1271	56937
hsa-miR-1271	5420
hsa-miR-1271	10622
hsa-miR-1271	25833
hsa-miR-1271	51645
hsa-miR-1271	9647
hsa-miR-1271	6992
hsa-miR-1271	4659
hsa-miR-1271	54776
hsa-miR-1271	84687
hsa-miR-1271	5523
hsa-miR-1271	5523
hsa-miR-1271	5530
hsa-miR-1271	5534
hsa-miR-1271	5534
hsa-miR-1271	9055
hsa-miR-1271	63976
hsa-miR-1271	145270
hsa-miR-1271	5573
hsa-miR-1271	5581
hsa-miR-1271	60675
hsa-miR-1271	11212
hsa-miR-1271	80742
hsa-miR-1271	79057
hsa-miR-1271	79057
hsa-miR-1271	285368
hsa-miR-1271	23198
hsa-miR-1271	5733
hsa-miR-1271	7803
hsa-miR-1271	5780
hsa-miR-1271	5791
hsa-miR-1271	5799
hsa-miR-1271	9543
hsa-miR-1271	51715
hsa-miR-1271	83871
hsa-miR-1271	11021
hsa-miR-1271	10966
hsa-miR-1271	51560
hsa-miR-1271	51762
hsa-miR-1271	23637
hsa-miR-1271	5877
hsa-miR-1271	5879
hsa-miR-1271	5887
hsa-miR-1271	5899
hsa-miR-1271	9649
hsa-miR-1271	5912
hsa-miR-1271	11069
hsa-miR-1271	9771
hsa-miR-1271	5916
hsa-miR-1271	55225
hsa-miR-1271	55920
hsa-miR-1271	157506
hsa-miR-1271	5962
hsa-miR-1271	65055
hsa-miR-1271	768211
hsa-miR-1271	9185
hsa-miR-1271	51455
hsa-miR-1271	23180
hsa-miR-1271	5997
hsa-miR-1271	9886
hsa-miR-1271	85415
hsa-miR-1271	253260
hsa-miR-1271	253260
hsa-miR-1271	9783
hsa-miR-1271	140730
hsa-miR-1271	11236
hsa-miR-1271	138065
hsa-miR-1271	727800
hsa-miR-1271	10193
hsa-miR-1271	6251
hsa-miR-1271	80230
hsa-miR-1271	201965
hsa-miR-1271	9294
hsa-miR-1271	401474
hsa-miR-1271	51119
hsa-miR-1271	6309
hsa-miR-1271	256380
hsa-miR-1271	6323
hsa-miR-1271	6326
hsa-miR-1271	6328
hsa-miR-1271	6335
hsa-miR-1271	57147
hsa-miR-1271	6383
hsa-miR-1271	23541
hsa-miR-1271	7095
hsa-miR-1271	85465
hsa-miR-1271	85465
hsa-miR-1271	9037
hsa-miR-1271	57556
hsa-miR-1271	55752
hsa-miR-1271	10801
hsa-miR-1271	80854
hsa-miR-1271	26470
hsa-miR-1271	6431
hsa-miR-1271	23678
hsa-miR-1271	166929
hsa-miR-1271	83442
hsa-miR-1271	9467
hsa-miR-1271	9467
hsa-miR-1271	30011
hsa-miR-1271	285590
hsa-miR-1271	285590
hsa-miR-1271	6464
hsa-miR-1271	399694
hsa-miR-1271	6474
hsa-miR-1271	23309
hsa-miR-1271	57606
hsa-miR-1271	57606
hsa-miR-1271	8273
hsa-miR-1271	57468
hsa-miR-1271	9990
hsa-miR-1271	9194
hsa-miR-1271	220963
hsa-miR-1271	6572
hsa-miR-1271	6505
hsa-miR-1271	6505
hsa-miR-1271	6506
hsa-miR-1271	6506
hsa-miR-1271	6584
hsa-miR-1271	123041
hsa-miR-1271	6576
hsa-miR-1271	8034
hsa-miR-1271	284439
hsa-miR-1271	5172
hsa-miR-1271	115019
hsa-miR-1271	9197
hsa-miR-1271	10559
hsa-miR-1271	7355
hsa-miR-1271	55343
hsa-miR-1271	339665
hsa-miR-1271	55089
hsa-miR-1271	27173
hsa-miR-1271	27173
hsa-miR-1271	57181
hsa-miR-1271	55334
hsa-miR-1271	57153
hsa-miR-1271	113235
hsa-miR-1271	6533
hsa-miR-1271	6536
hsa-miR-1271	23428
hsa-miR-1271	6549
hsa-miR-1271	4092
hsa-miR-1271	125170
hsa-miR-1271	140775
hsa-miR-1271	55671
hsa-miR-1271	8773
hsa-miR-1271	150094
hsa-miR-1271	64089
hsa-miR-1271	9784
hsa-miR-1271	92017
hsa-miR-1271	401548
hsa-miR-1271	401548
hsa-miR-1271	401548
hsa-miR-1271	401548
hsa-miR-1271	6272
hsa-miR-1271	6654
hsa-miR-1271	6660
hsa-miR-1271	6660
hsa-miR-1271	55553
hsa-miR-1271	6670
hsa-miR-1271	121340
hsa-miR-1271	6683
hsa-miR-1271	23013
hsa-miR-1271	10927
hsa-miR-1271	10927
hsa-miR-1271	10927
hsa-miR-1271	169981
hsa-miR-1271	56907
hsa-miR-1271	10251
hsa-miR-1271	80176
hsa-miR-1271	136853
hsa-miR-1271	6760
hsa-miR-1271	85464
hsa-miR-1271	6483
hsa-miR-1271	6487
hsa-miR-1271	256435
hsa-miR-1271	56910
hsa-miR-1271	8614
hsa-miR-1271	9263
hsa-miR-1271	140901
hsa-miR-1271	6811
hsa-miR-1271	23224
hsa-miR-1271	143425
hsa-miR-1271	6867
hsa-miR-1271	6867
hsa-miR-1271	8148
hsa-miR-1271	6874
hsa-miR-1271	6875
hsa-miR-1271	57551
hsa-miR-1271	202018
hsa-miR-1271	55633
hsa-miR-1271	9882
hsa-miR-1271	6907
hsa-miR-1271	6899
hsa-miR-1271	6913
hsa-miR-1271	6941
hsa-miR-1271	7003
hsa-miR-1271	7009
hsa-miR-1271	7037
hsa-miR-1271	7058
hsa-miR-1271	7074
hsa-miR-1271	7092
hsa-miR-1271	9777
hsa-miR-1271	11070
hsa-miR-1271	55654
hsa-miR-1271	284339
hsa-miR-1271	81615
hsa-miR-1271	92691
hsa-miR-1271	100113407
hsa-miR-1271	387521
hsa-miR-1271	130612
hsa-miR-1271	757
hsa-miR-1271	144110
hsa-miR-1271	27327
hsa-miR-1271	7145
hsa-miR-1271	64759
hsa-miR-1271	9760
hsa-miR-1271	84969
hsa-miR-1271	27324
hsa-miR-1271	94241
hsa-miR-1271	9697
hsa-miR-1271	57761
hsa-miR-1271	4591
hsa-miR-1271	80128
hsa-miR-1271	81844
hsa-miR-1271	81786
hsa-miR-1271	1831
hsa-miR-1271	25987
hsa-miR-1271	81619
hsa-miR-1271	10867
hsa-miR-1271	146057
hsa-miR-1271	79183
hsa-miR-1271	80727
hsa-miR-1271	80727
hsa-miR-1271	81542
hsa-miR-1271	51619
hsa-miR-1271	7326
hsa-miR-1271	3093
hsa-miR-1271	7332
hsa-miR-1271	56061
hsa-miR-1271	197131
hsa-miR-1271	23197
hsa-miR-1271	7371
hsa-miR-1271	54887
hsa-miR-1271	440279
hsa-miR-1271	64718
hsa-miR-1271	9958
hsa-miR-1271	8078
hsa-miR-1271	9712
hsa-miR-1271	9341
hsa-miR-1271	9341
hsa-miR-1271	57216
hsa-miR-1271	10493
hsa-miR-1271	10493
hsa-miR-1271	7414
hsa-miR-1271	389136
hsa-miR-1271	7436
hsa-miR-1271	112936
hsa-miR-1271	10163
hsa-miR-1271	79269
hsa-miR-1271	80335
hsa-miR-1271	7456
hsa-miR-1271	26100
hsa-miR-1271	26100
hsa-miR-1271	331
hsa-miR-1271	114786
hsa-miR-1271	7525
hsa-miR-1271	84272
hsa-miR-1271	7532
hsa-miR-1271	284273
hsa-miR-1271	51776
hsa-miR-1271	9923
hsa-miR-1271	360023
hsa-miR-1271	360023
hsa-miR-1271	85463
hsa-miR-1271	376940
hsa-miR-1271	23318
hsa-miR-1271	23174
hsa-miR-1271	85364
hsa-miR-1271	23390
hsa-miR-1271	25921
hsa-miR-1271	10444
hsa-miR-1271	7763
hsa-miR-1271	79776
hsa-miR-1271	677
hsa-miR-1271	11244
hsa-miR-1271	22882
hsa-miR-1271	7546
hsa-miR-1271	7547
hsa-miR-1271	140883
hsa-miR-1271	57541
hsa-miR-1271	203523
hsa-miR-1271	55205
hsa-miR-1271	23060
hsa-miR-1271	90874
hsa-miR-1271	619279
hsa-miR-1271	128611
hsa-miR-1271	84937
hsa-miR-1274b	27
hsa-miR-1274b	204
hsa-miR-1274b	79647
hsa-miR-1274b	51479
hsa-miR-1274b	23439
hsa-miR-1274b	534
hsa-miR-1274b	60468
hsa-miR-1274b	60468
hsa-miR-1274b	9031
hsa-miR-1274b	29994
hsa-miR-1274b	29994
hsa-miR-1274b	9774
hsa-miR-1274b	627
hsa-miR-1274b	79892
hsa-miR-1274b	114898
hsa-miR-1274b	343990
hsa-miR-1274b	389206
hsa-miR-1274b	894
hsa-miR-1274b	23527
hsa-miR-1274b	54805
hsa-miR-1274b	26047
hsa-miR-1274b	200407
hsa-miR-1274b	83716
hsa-miR-1274b	56998
hsa-miR-1274b	10659
hsa-miR-1274b	1543
hsa-miR-1274b	1641
hsa-miR-1274b	134218
hsa-miR-1274b	64641
hsa-miR-1274b	1975
hsa-miR-1274b	84034
hsa-miR-1274b	2046
hsa-miR-1274b	2049
hsa-miR-1274b	10613
hsa-miR-1274b	2119
hsa-miR-1274b	2122
hsa-miR-1274b	51059
hsa-miR-1274b	285016
hsa-miR-1274b	54620
hsa-miR-1274b	55137
hsa-miR-1274b	10818
hsa-miR-1274b	9513
hsa-miR-1274b	2589
hsa-miR-1274b	2627
hsa-miR-1274b	79709
hsa-miR-1274b	2771
hsa-miR-1274b	118442
hsa-miR-1274b	3038
hsa-miR-1274b	643752
hsa-miR-1274b	28996
hsa-miR-1274b	3178
hsa-miR-1274b	3184
hsa-miR-1274b	9987
hsa-miR-1274b	3200
hsa-miR-1274b	3200
hsa-miR-1274b	3213
hsa-miR-1274b	11141
hsa-miR-1274b	80853
hsa-miR-1274b	9929
hsa-miR-1274b	3726
hsa-miR-1274b	57673
hsa-miR-1274b	23095
hsa-miR-1274b	688
hsa-miR-1274b	10314
hsa-miR-1274b	375323
hsa-miR-1274b	80059
hsa-miR-1274b	80059
hsa-miR-1274b	4074
hsa-miR-1274b	6416
hsa-miR-1274b	161357
hsa-miR-1274b	5469
hsa-miR-1274b	8897
hsa-miR-1274b	8897
hsa-miR-1274b	4641
hsa-miR-1274b	23040
hsa-miR-1274b	89797
hsa-miR-1274b	8440
hsa-miR-1274b	4781
hsa-miR-1274b	4784
hsa-miR-1274b	4826
hsa-miR-1274b	4841
hsa-miR-1274b	9480
hsa-miR-1274b	64282
hsa-miR-1274b	55742
hsa-miR-1274b	5290
hsa-miR-1274b	11040
hsa-miR-1274b	5305
hsa-miR-1274b	5309
hsa-miR-1274b	5457
hsa-miR-1274b	283659
hsa-miR-1274b	7803
hsa-miR-1274b	5789
hsa-miR-1274b	5908
hsa-miR-1274b	1104
hsa-miR-1274b	8608
hsa-miR-1274b	11102
hsa-miR-1274b	6382
hsa-miR-1274b	84251
hsa-miR-1274b	79939
hsa-miR-1274b	23446
hsa-miR-1274b	388662
hsa-miR-1274b	60682
hsa-miR-1274b	55671
hsa-miR-1274b	751867
hsa-miR-1274b	6645
hsa-miR-1274b	81609
hsa-miR-1274b	55084
hsa-miR-1274b	10174
hsa-miR-1274b	6654
hsa-miR-1274b	23111
hsa-miR-1274b	117178
hsa-miR-1274b	55530
hsa-miR-1274b	6910
hsa-miR-1274b	7023
hsa-miR-1274b	7074
hsa-miR-1274b	100113407
hsa-miR-1274b	201931
hsa-miR-1274b	79626
hsa-miR-1274b	23112
hsa-miR-1274b	7846
hsa-miR-1274b	29128
hsa-miR-1274b	137970
hsa-miR-1274b	64854
hsa-miR-1274b	7415
hsa-miR-1274b	25853
hsa-miR-1274b	55841
hsa-miR-1274b	7534
hsa-miR-1274b	9889
hsa-miR-1274b	7763
hsa-miR-1274b	10771
hsa-miR-1274b	151126
hsa-miR-1274b	9658
hsa-miR-1274b	54989
hsa-miR-1296	116
hsa-miR-1296	60509
hsa-miR-1296	168667
hsa-miR-1296	283450
hsa-miR-1296	79012
hsa-miR-1296	84181
hsa-miR-1296	91851
hsa-miR-1296	5977
hsa-miR-1296	10495
hsa-miR-1296	54749
hsa-miR-1296	51307
hsa-miR-1296	57459
hsa-miR-1296	54329
hsa-miR-1296	10525
hsa-miR-1296	83737
hsa-miR-1296	56888
hsa-miR-1296	23325
hsa-miR-1296	84458
hsa-miR-1296	3977
hsa-miR-1296	84281
hsa-miR-1296	55193
hsa-miR-1296	399909
hsa-miR-1296	5362
hsa-miR-1296	9810
hsa-miR-1296	254428
hsa-miR-1296	169981
hsa-miR-1296	6745
hsa-miR-1296	4943
hsa-miR-1296	51330
hsa-miR-1296	9320
hsa-miR-1296	653121
hsa-miR-1296	25925
hsa-miR-1296	57169
hsa-miR-138	92
hsa-miR-138	93
hsa-miR-138	11096
hsa-miR-138	57188
hsa-miR-138	107
hsa-miR-138	150
hsa-miR-138	121536
hsa-miR-138	4299
hsa-miR-138	3899
hsa-miR-138	23382
hsa-miR-138	11215
hsa-miR-138	9949
hsa-miR-138	9949
hsa-miR-138	286
hsa-miR-138	286
hsa-miR-138	51479
hsa-miR-138	124930
hsa-miR-138	129138
hsa-miR-138	50650
hsa-miR-138	10123
hsa-miR-138	221079
hsa-miR-138	221079
hsa-miR-138	10550
hsa-miR-138	408
hsa-miR-138	79827
hsa-miR-138	85300
hsa-miR-138	286410
hsa-miR-138	573
hsa-miR-138	9031
hsa-miR-138	29994
hsa-miR-138	53335
hsa-miR-138	10904
hsa-miR-138	665
hsa-miR-138	84464
hsa-miR-138	11149
hsa-miR-138	196740
hsa-miR-138	55216
hsa-miR-138	55668
hsa-miR-138	57184
hsa-miR-138	79018
hsa-miR-138	55421
hsa-miR-138	26099
hsa-miR-138	116151
hsa-miR-138	140710
hsa-miR-138	58490
hsa-miR-138	58490
hsa-miR-138	23313
hsa-miR-138	64771
hsa-miR-138	57827
hsa-miR-138	23731
hsa-miR-138	91860
hsa-miR-138	83698
hsa-miR-138	836
hsa-miR-138	9139
hsa-miR-138	90550
hsa-miR-138	896
hsa-miR-138	81669
hsa-miR-138	23097
hsa-miR-138	1021
hsa-miR-138	1951
hsa-miR-138	9486
hsa-miR-138	6249
hsa-miR-138	1203
hsa-miR-138	1207
hsa-miR-138	246175
hsa-miR-138	246175
hsa-miR-138	9337
hsa-miR-138	10699
hsa-miR-138	23406
hsa-miR-138	64764
hsa-miR-138	58487
hsa-miR-138	51496
hsa-miR-138	56998
hsa-miR-138	8065
hsa-miR-138	23500
hsa-miR-138	1602
hsa-miR-138	23604
hsa-miR-138	55802
hsa-miR-138	55802
hsa-miR-138	23142
hsa-miR-138	7913
hsa-miR-138	57706
hsa-miR-138	79947
hsa-miR-138	1840
hsa-miR-138	23220
hsa-miR-138	23220
hsa-miR-138	1870
hsa-miR-138	1871
hsa-miR-138	1879
hsa-miR-138	80153
hsa-miR-138	1949
hsa-miR-138	23741
hsa-miR-138	26523
hsa-miR-138	26523
hsa-miR-138	192670
hsa-miR-138	1978
hsa-miR-138	84337
hsa-miR-138	326342
hsa-miR-138	2020
hsa-miR-138	2035
hsa-miR-138	54566
hsa-miR-138	2046
hsa-miR-138	2046
hsa-miR-138	2066
hsa-miR-138	201627
hsa-miR-138	51029
hsa-miR-138	54629
hsa-miR-138	151354
hsa-miR-138	150726
hsa-miR-138	23403
hsa-miR-138	56929
hsa-miR-138	10979
hsa-miR-138	284369
hsa-miR-138	54752
hsa-miR-138	2355
hsa-miR-138	116113
hsa-miR-138	116113
hsa-miR-138	116113
hsa-miR-138	55691
hsa-miR-138	10818
hsa-miR-138	55568
hsa-miR-138	442117
hsa-miR-138	8522
hsa-miR-138	54815
hsa-miR-138	57459
hsa-miR-138	28964
hsa-miR-138	256356
hsa-miR-138	2736
hsa-miR-138	2760
hsa-miR-138	2771
hsa-miR-138	54331
hsa-miR-138	10243
hsa-miR-138	25960
hsa-miR-138	57512
hsa-miR-138	2827
hsa-miR-138	2894
hsa-miR-138	2909
hsa-miR-138	9567
hsa-miR-138	3021
hsa-miR-138	401399
hsa-miR-138	9759
hsa-miR-138	3091
hsa-miR-138	55662
hsa-miR-138	9677
hsa-miR-138	9677
hsa-miR-138	3098
hsa-miR-138	10042
hsa-miR-138	27429
hsa-miR-138	389792
hsa-miR-138	10644
hsa-miR-138	9807
hsa-miR-138	54928
hsa-miR-138	3621
hsa-miR-138	10526
hsa-miR-138	9922
hsa-miR-138	5927
hsa-miR-138	5927
hsa-miR-138	8242
hsa-miR-138	3720
hsa-miR-138	221895
hsa-miR-138	221037
hsa-miR-138	23135
hsa-miR-138	9929
hsa-miR-138	9929
hsa-miR-138	23189
hsa-miR-138	55709
hsa-miR-138	3777
hsa-miR-138	3778
hsa-miR-138	9870
hsa-miR-138	23281
hsa-miR-138	26049
hsa-miR-138	57614
hsa-miR-138	84530
hsa-miR-138	84530
hsa-miR-138	26153
hsa-miR-138	8462
hsa-miR-138	23276
hsa-miR-138	84456
hsa-miR-138	84247
hsa-miR-138	114823
hsa-miR-138	375612
hsa-miR-138	22998
hsa-miR-138	3984
hsa-miR-138	339123
hsa-miR-138	402117
hsa-miR-138	402665
hsa-miR-138	22859
hsa-miR-138	26065
hsa-miR-138	10434
hsa-miR-138	23499
hsa-miR-138	9794
hsa-miR-138	5609
hsa-miR-138	4296
hsa-miR-138	5596
hsa-miR-138	5597
hsa-miR-138	22919
hsa-miR-138	4082
hsa-miR-138	92312
hsa-miR-138	146664
hsa-miR-138	54531
hsa-miR-138	57409
hsa-miR-138	50488
hsa-miR-138	58508
hsa-miR-138	4302
hsa-miR-138	22808
hsa-miR-138	4440
hsa-miR-138	22823
hsa-miR-138	4084
hsa-miR-138	10608
hsa-miR-138	7994
hsa-miR-138	26960
hsa-miR-138	8648
hsa-miR-138	10529
hsa-miR-138	26012
hsa-miR-138	4760
hsa-miR-138	10725
hsa-miR-138	4781
hsa-miR-138	4781
hsa-miR-138	4781
hsa-miR-138	4784
hsa-miR-138	4784
hsa-miR-138	4784
hsa-miR-138	57555
hsa-miR-138	4836
hsa-miR-138	4826
hsa-miR-138	4857
hsa-miR-138	4884
hsa-miR-138	55968
hsa-miR-138	4915
hsa-miR-138	4940
hsa-miR-138	23252
hsa-miR-138	340529
hsa-miR-138	64282
hsa-miR-138	5069
hsa-miR-138	10336
hsa-miR-138	27445
hsa-miR-138	115294
hsa-miR-138	22990
hsa-miR-138	5126
hsa-miR-138	27115
hsa-miR-138	149420
hsa-miR-138	10611
hsa-miR-138	5218
hsa-miR-138	51317
hsa-miR-138	8929
hsa-miR-138	79837
hsa-miR-138	5326
hsa-miR-138	9842
hsa-miR-138	80301
hsa-miR-138	51090
hsa-miR-138	91584
hsa-miR-138	23654
hsa-miR-138	23654
hsa-miR-138	23654
hsa-miR-138	11044
hsa-miR-138	5467
hsa-miR-138	10891
hsa-miR-138	54704
hsa-miR-138	9762
hsa-miR-138	55660
hsa-miR-138	84249
hsa-miR-138	9491
hsa-miR-138	5747
hsa-miR-138	7803
hsa-miR-138	8073
hsa-miR-138	5781
hsa-miR-138	5791
hsa-miR-138	114825
hsa-miR-138	8766
hsa-miR-138	57403
hsa-miR-138	22930
hsa-miR-138	9649
hsa-miR-138	5914
hsa-miR-138	5914
hsa-miR-138	51285
hsa-miR-138	125950
hsa-miR-138	9821
hsa-miR-138	5928
hsa-miR-138	10231
hsa-miR-138	55758
hsa-miR-138	50700
hsa-miR-138	5649
hsa-miR-138	9628
hsa-miR-138	389
hsa-miR-138	9699
hsa-miR-138	9783
hsa-miR-138	140730
hsa-miR-138	157807
hsa-miR-138	157807
hsa-miR-138	64795
hsa-miR-138	64795
hsa-miR-138	9781
hsa-miR-138	11237
hsa-miR-138	152006
hsa-miR-138	9475
hsa-miR-138	6195
hsa-miR-138	401474
hsa-miR-138	55291
hsa-miR-138	6324
hsa-miR-138	55800
hsa-miR-138	9805
hsa-miR-138	85465
hsa-miR-138	54910
hsa-miR-138	57556
hsa-miR-138	29843
hsa-miR-138	55752
hsa-miR-138	26470
hsa-miR-138	6431
hsa-miR-138	6433
hsa-miR-138	6449
hsa-miR-138	10019
hsa-miR-138	10019
hsa-miR-138	117157
hsa-miR-138	6456
hsa-miR-138	79628
hsa-miR-138	22941
hsa-miR-138	6492
hsa-miR-138	6493
hsa-miR-138	25942
hsa-miR-138	25942
hsa-miR-138	23411
hsa-miR-138	6567
hsa-miR-138	57030
hsa-miR-138	222553
hsa-miR-138	81539
hsa-miR-138	9498
hsa-miR-138	388662
hsa-miR-138	6535
hsa-miR-138	64744
hsa-miR-138	125170
hsa-miR-138	6616
hsa-miR-138	9627
hsa-miR-138	6620
hsa-miR-138	401548
hsa-miR-138	257364
hsa-miR-138	55084
hsa-miR-138	9655
hsa-miR-138	9306
hsa-miR-138	6666
hsa-miR-138	6666
hsa-miR-138	6659
hsa-miR-138	10290
hsa-miR-138	6710
hsa-miR-138	9901
hsa-miR-138	27090
hsa-miR-138	10274
hsa-miR-138	51111
hsa-miR-138	9900
hsa-miR-138	90196
hsa-miR-138	57586
hsa-miR-138	6907
hsa-miR-138	352954
hsa-miR-138	85012
hsa-miR-138	6938
hsa-miR-138	6929
hsa-miR-138	6925
hsa-miR-138	7003
hsa-miR-138	57215
hsa-miR-138	90459
hsa-miR-138	9967
hsa-miR-138	7068
hsa-miR-138	7068
hsa-miR-138	25976
hsa-miR-138	7082
hsa-miR-138	338773
hsa-miR-138	55314
hsa-miR-138	130612
hsa-miR-138	130612
hsa-miR-138	84899
hsa-miR-138	7292
hsa-miR-138	23112
hsa-miR-138	58476
hsa-miR-138	58476
hsa-miR-138	7227
hsa-miR-138	23170
hsa-miR-138	56995
hsa-miR-138	55585
hsa-miR-138	54926
hsa-miR-138	7342
hsa-miR-138	54887
hsa-miR-138	90249
hsa-miR-138	137970
hsa-miR-138	137970
hsa-miR-138	26019
hsa-miR-138	9100
hsa-miR-138	55031
hsa-miR-138	81839
hsa-miR-138	7417
hsa-miR-138	7716
hsa-miR-138	7431
hsa-miR-138	128434
hsa-miR-138	56270
hsa-miR-138	54853
hsa-miR-138	54904
hsa-miR-138	23286
hsa-miR-138	54464
hsa-miR-138	81555
hsa-miR-138	219539
hsa-miR-138	29068
hsa-miR-138	92999
hsa-miR-138	653121
hsa-miR-138	23264
hsa-miR-138	23174
hsa-miR-138	9839
hsa-miR-138	10444
hsa-miR-138	678
hsa-miR-138	23414
hsa-miR-138	57178
hsa-miR-138	10771
hsa-miR-138	7707
hsa-miR-138	10838
hsa-miR-138	23036
hsa-miR-138	25946
hsa-miR-138	55311
hsa-miR-138	23060
hsa-miR-138	79027
hsa-miR-138	619279
hsa-miR-138	155061
hsa-miR-138	54764
hsa-miR-140-3p	11057
hsa-miR-140-3p	93
hsa-miR-140-3p	93
hsa-miR-140-3p	6868
hsa-miR-140-3p	11096
hsa-miR-140-3p	11174
hsa-miR-140-3p	115
hsa-miR-140-3p	27125
hsa-miR-140-3p	56895
hsa-miR-140-3p	23382
hsa-miR-140-3p	220
hsa-miR-140-3p	287
hsa-miR-140-3p	283373
hsa-miR-140-3p	187
hsa-miR-140-3p	334
hsa-miR-140-3p	381
hsa-miR-140-3p	196528
hsa-miR-140-3p	10123
hsa-miR-140-3p	54470
hsa-miR-140-3p	56970
hsa-miR-140-3p	8706
hsa-miR-140-3p	23621
hsa-miR-140-3p	573
hsa-miR-140-3p	22893
hsa-miR-140-3p	596
hsa-miR-140-3p	627
hsa-miR-140-3p	8927
hsa-miR-140-3p	694
hsa-miR-140-3p	9256
hsa-miR-140-3p	80209
hsa-miR-140-3p	55731
hsa-miR-140-3p	753
hsa-miR-140-3p	9315
hsa-miR-140-3p	158427
hsa-miR-140-3p	81928
hsa-miR-140-3p	4076
hsa-miR-140-3p	4076
hsa-miR-140-3p	867
hsa-miR-140-3p	867
hsa-miR-140-3p	905
hsa-miR-140-3p	1021
hsa-miR-140-3p	10659
hsa-miR-140-3p	1523
hsa-miR-140-3p	84663
hsa-miR-140-3p	9802
hsa-miR-140-3p	123879
hsa-miR-140-3p	11056
hsa-miR-140-3p	79961
hsa-miR-140-3p	1608
hsa-miR-140-3p	1759
hsa-miR-140-3p	23348
hsa-miR-140-3p	1821
hsa-miR-140-3p	23220
hsa-miR-140-3p	144455
hsa-miR-140-3p	112399
hsa-miR-140-3p	2020
hsa-miR-140-3p	55179
hsa-miR-140-3p	89853
hsa-miR-140-3p	23014
hsa-miR-140-3p	254170
hsa-miR-140-3p	254170
hsa-miR-140-3p	55294
hsa-miR-140-3p	127943
hsa-miR-140-3p	54891
hsa-miR-140-3p	2290
hsa-miR-140-3p	3607
hsa-miR-140-3p	57459
hsa-miR-140-3p	57120
hsa-miR-140-3p	57512
hsa-miR-140-3p	2909
hsa-miR-140-3p	26959
hsa-miR-140-3p	643752
hsa-miR-140-3p	9759
hsa-miR-140-3p	3131
hsa-miR-140-3p	220988
hsa-miR-140-3p	3215
hsa-miR-140-3p	3241
hsa-miR-140-3p	51440
hsa-miR-140-3p	55806
hsa-miR-140-3p	9653
hsa-miR-140-3p	90161
hsa-miR-140-3p	3339
hsa-miR-140-3p	10525
hsa-miR-140-3p	3702
hsa-miR-140-3p	182
hsa-miR-140-3p	56888
hsa-miR-140-3p	3778
hsa-miR-140-3p	3778
hsa-miR-140-3p	147040
hsa-miR-140-3p	200845
hsa-miR-140-3p	23070
hsa-miR-140-3p	9778
hsa-miR-140-3p	57189
hsa-miR-140-3p	57805
hsa-miR-140-3p	340533
hsa-miR-140-3p	10749
hsa-miR-140-3p	3798
hsa-miR-140-3p	9314
hsa-miR-140-3p	3836
hsa-miR-140-3p	3840
hsa-miR-140-3p	3915
hsa-miR-140-3p	23367
hsa-miR-140-3p	10184
hsa-miR-140-3p	4009
hsa-miR-140-3p	4097
hsa-miR-140-3p	79917
hsa-miR-140-3p	84557
hsa-miR-140-3p	23118
hsa-miR-140-3p	5594
hsa-miR-140-3p	22924
hsa-miR-140-3p	10299
hsa-miR-140-3p	4082
hsa-miR-140-3p	23263
hsa-miR-140-3p	4204
hsa-miR-140-3p	116931
hsa-miR-140-3p	23608
hsa-miR-140-3p	4338
hsa-miR-140-3p	4602
hsa-miR-140-3p	340156
hsa-miR-140-3p	11143
hsa-miR-140-3p	266812
hsa-miR-140-3p	1463
hsa-miR-140-3p	3340
hsa-miR-140-3p	10725
hsa-miR-140-3p	4800
hsa-miR-140-3p	55922
hsa-miR-140-3p	4841
hsa-miR-140-3p	4857
hsa-miR-140-3p	8856
hsa-miR-140-3p	7026
hsa-miR-140-3p	8204
hsa-miR-140-3p	8204
hsa-miR-140-3p	4905
hsa-miR-140-3p	9972
hsa-miR-140-3p	23511
hsa-miR-140-3p	64359
hsa-miR-140-3p	10178
hsa-miR-140-3p	29789
hsa-miR-140-3p	9480
hsa-miR-140-3p	56957
hsa-miR-140-3p	5015
hsa-miR-140-3p	29993
hsa-miR-140-3p	5062
hsa-miR-140-3p	9060
hsa-miR-140-3p	27328
hsa-miR-140-3p	27253
hsa-miR-140-3p	5099
hsa-miR-140-3p	5100
hsa-miR-140-3p	57107
hsa-miR-140-3p	5298
hsa-miR-140-3p	8396
hsa-miR-140-3p	11044
hsa-miR-140-3p	8613
hsa-miR-140-3p	5500
hsa-miR-140-3p	9265
hsa-miR-140-3p	5727
hsa-miR-140-3p	5728
hsa-miR-140-3p	5770
hsa-miR-140-3p	5908
hsa-miR-140-3p	5915
hsa-miR-140-3p	153020
hsa-miR-140-3p	23543
hsa-miR-140-3p	149041
hsa-miR-140-3p	7905
hsa-miR-140-3p	91869
hsa-miR-140-3p	64864
hsa-miR-140-3p	387
hsa-miR-140-3p	253260
hsa-miR-140-3p	22838
hsa-miR-140-3p	9616
hsa-miR-140-3p	6092
hsa-miR-140-3p	56261
hsa-miR-140-3p	6197
hsa-miR-140-3p	22800
hsa-miR-140-3p	10313
hsa-miR-140-3p	23314
hsa-miR-140-3p	29970
hsa-miR-140-3p	6323
hsa-miR-140-3p	6328
hsa-miR-140-3p	9723
hsa-miR-140-3p	84251
hsa-miR-140-3p	79834
hsa-miR-140-3p	140885
hsa-miR-140-3p	23411
hsa-miR-140-3p	57606
hsa-miR-140-3p	201780
hsa-miR-140-3p	6526
hsa-miR-140-3p	79811
hsa-miR-140-3p	6595
hsa-miR-140-3p	6599
hsa-miR-140-3p	140775
hsa-miR-140-3p	55084
hsa-miR-140-3p	55084
hsa-miR-140-3p	122809
hsa-miR-140-3p	6654
hsa-miR-140-3p	6654
hsa-miR-140-3p	6666
hsa-miR-140-3p	6666
hsa-miR-140-3p	6670
hsa-miR-140-3p	6671
hsa-miR-140-3p	200734
hsa-miR-140-3p	81848
hsa-miR-140-3p	9901
hsa-miR-140-3p	6747
hsa-miR-140-3p	10735
hsa-miR-140-3p	51111
hsa-miR-140-3p	23512
hsa-miR-140-3p	6853
hsa-miR-140-3p	81493
hsa-miR-140-3p	6873
hsa-miR-140-3p	4943
hsa-miR-140-3p	254048
hsa-miR-140-3p	7003
hsa-miR-140-3p	200424
hsa-miR-140-3p	7039
hsa-miR-140-3p	60436
hsa-miR-140-3p	7091
hsa-miR-140-3p	7093
hsa-miR-140-3p	255919
hsa-miR-140-3p	8658
hsa-miR-140-3p	8658
hsa-miR-140-3p	146691
hsa-miR-140-3p	51592
hsa-miR-140-3p	56658
hsa-miR-140-3p	7227
hsa-miR-140-3p	80727
hsa-miR-140-3p	7301
hsa-miR-140-3p	55585
hsa-miR-140-3p	127733
hsa-miR-140-3p	23197
hsa-miR-140-3p	64718
hsa-miR-140-3p	121665
hsa-miR-140-3p	57478
hsa-miR-140-3p	9736
hsa-miR-140-3p	8239
hsa-miR-140-3p	6844
hsa-miR-140-3p	57216
hsa-miR-140-3p	9218
hsa-miR-140-3p	57590
hsa-miR-140-3p	80344
hsa-miR-140-3p	7532
hsa-miR-140-3p	7534
hsa-miR-140-3p	51776
hsa-miR-140-3p	23211
hsa-miR-140-3p	376940
hsa-miR-140-3p	23264
hsa-miR-140-3p	7763
hsa-miR-140-3p	9202
hsa-miR-140-3p	23567
hsa-miR-140-3p	27153
hsa-miR-146b-3p	64137
hsa-miR-146b-3p	8728
hsa-miR-146b-3p	55966
hsa-miR-146b-3p	311
hsa-miR-146b-3p	359
hsa-miR-146b-3p	10123
hsa-miR-146b-3p	9334
hsa-miR-146b-3p	23621
hsa-miR-146b-3p	84446
hsa-miR-146b-3p	54014
hsa-miR-146b-3p	64897
hsa-miR-146b-3p	9315
hsa-miR-146b-3p	55450
hsa-miR-146b-3p	29070
hsa-miR-146b-3p	389206
hsa-miR-146b-3p	894
hsa-miR-146b-3p	146059
hsa-miR-146b-3p	51816
hsa-miR-146b-3p	11261
hsa-miR-146b-3p	26047
hsa-miR-146b-3p	80315
hsa-miR-146b-3p	10814
hsa-miR-146b-3p	1523
hsa-miR-146b-3p	26999
hsa-miR-146b-3p	1627
hsa-miR-146b-3p	123879
hsa-miR-146b-3p	1641
hsa-miR-146b-3p	54788
hsa-miR-146b-3p	57453
hsa-miR-146b-3p	8445
hsa-miR-146b-3p	2099
hsa-miR-146b-3p	2099
hsa-miR-146b-3p	2119
hsa-miR-146b-3p	2137
hsa-miR-146b-3p	57700
hsa-miR-146b-3p	10160
hsa-miR-146b-3p	254170
hsa-miR-146b-3p	2332
hsa-miR-146b-3p	7855
hsa-miR-146b-3p	81544
hsa-miR-146b-3p	84662
hsa-miR-146b-3p	79709
hsa-miR-146b-3p	28996
hsa-miR-146b-3p	3560
hsa-miR-146b-3p	3633
hsa-miR-146b-3p	25959
hsa-miR-146b-3p	3736
hsa-miR-146b-3p	23416
hsa-miR-146b-3p	3766
hsa-miR-146b-3p	3770
hsa-miR-146b-3p	283219
hsa-miR-146b-3p	3797
hsa-miR-146b-3p	200942
hsa-miR-146b-3p	84894
hsa-miR-146b-3p	283514
hsa-miR-146b-3p	387856
hsa-miR-146b-3p	124801
hsa-miR-146b-3p	149986
hsa-miR-146b-3p	4294
hsa-miR-146b-3p	92979
hsa-miR-146b-3p	1954
hsa-miR-146b-3p	10893
hsa-miR-146b-3p	9643
hsa-miR-146b-3p	253827
hsa-miR-146b-3p	89797
hsa-miR-146b-3p	7182
hsa-miR-146b-3p	4897
hsa-miR-146b-3p	9480
hsa-miR-146b-3p	5017
hsa-miR-146b-3p	80227
hsa-miR-146b-3p	5127
hsa-miR-146b-3p	5210
hsa-miR-146b-3p	5326
hsa-miR-146b-3p	79990
hsa-miR-146b-3p	5452
hsa-miR-146b-3p	84152
hsa-miR-146b-3p	639
hsa-miR-146b-3p	5562
hsa-miR-146b-3p	55660
hsa-miR-146b-3p	5662
hsa-miR-146b-3p	139411
hsa-miR-146b-3p	5782
hsa-miR-146b-3p	5865
hsa-miR-146b-3p	221002
hsa-miR-146b-3p	91608
hsa-miR-146b-3p	91608
hsa-miR-146b-3p	5999
hsa-miR-146b-3p	84900
hsa-miR-146b-3p	6197
hsa-miR-146b-3p	6257
hsa-miR-146b-3p	9701
hsa-miR-146b-3p	57468
hsa-miR-146b-3p	169026
hsa-miR-146b-3p	1317
hsa-miR-146b-3p	55671
hsa-miR-146b-3p	23049
hsa-miR-146b-3p	6645
hsa-miR-146b-3p	254122
hsa-miR-146b-3p	6867
hsa-miR-146b-3p	254048
hsa-miR-146b-3p	200132
hsa-miR-146b-3p	54790
hsa-miR-146b-3p	7021
hsa-miR-146b-3p	83591
hsa-miR-146b-3p	7067
hsa-miR-146b-3p	7068
hsa-miR-146b-3p	28951
hsa-miR-146b-3p	9819
hsa-miR-146b-3p	79269
hsa-miR-146b-3p	55841
hsa-miR-146b-3p	51341
hsa-miR-146b-3p	23174
hsa-miR-146b-3p	84287
hsa-miR-146b-3p	9658
hsa-miR-146b-3p	114991
hsa-miR-146b-3p	84937
hsa-miR-181b	22848
hsa-miR-181b	22848
hsa-miR-181b	10006
hsa-miR-181b	25890
hsa-miR-181b	27
hsa-miR-181b	25841
hsa-miR-181b	176
hsa-miR-181b	2180
hsa-miR-181b	92
hsa-miR-181b	93
hsa-miR-181b	93
hsa-miR-181b	93
hsa-miR-181b	93
hsa-miR-181b	4185
hsa-miR-181b	4185
hsa-miR-181b	170692
hsa-miR-181b	171019
hsa-miR-181b	11096
hsa-miR-181b	11174
hsa-miR-181b	11174
hsa-miR-181b	92949
hsa-miR-181b	104
hsa-miR-181b	107
hsa-miR-181b	115
hsa-miR-181b	115
hsa-miR-181b	133
hsa-miR-181b	84890
hsa-miR-181b	84890
hsa-miR-181b	156
hsa-miR-181b	60312
hsa-miR-181b	4299
hsa-miR-181b	54812
hsa-miR-181b	10554
hsa-miR-181b	79026
hsa-miR-181b	50808
hsa-miR-181b	9472
hsa-miR-181b	65062
hsa-miR-181b	286
hsa-miR-181b	51479
hsa-miR-181b	81573
hsa-miR-181b	134548
hsa-miR-181b	57182
hsa-miR-181b	283373
hsa-miR-181b	164
hsa-miR-181b	130340
hsa-miR-181b	334
hsa-miR-181b	79135
hsa-miR-181b	377
hsa-miR-181b	382
hsa-miR-181b	50650
hsa-miR-181b	8874
hsa-miR-181b	196528
hsa-miR-181b	400
hsa-miR-181b	403
hsa-miR-181b	26225
hsa-miR-181b	9915
hsa-miR-181b	79642
hsa-miR-181b	79642
hsa-miR-181b	460
hsa-miR-181b	55102
hsa-miR-181b	472
hsa-miR-181b	23300
hsa-miR-181b	23250
hsa-miR-181b	286410
hsa-miR-181b	481
hsa-miR-181b	490
hsa-miR-181b	490
hsa-miR-181b	490
hsa-miR-181b	491
hsa-miR-181b	491
hsa-miR-181b	491
hsa-miR-181b	492
hsa-miR-181b	10396
hsa-miR-181b	5205
hsa-miR-181b	57198
hsa-miR-181b	26033
hsa-miR-181b	6310
hsa-miR-181b	6310
hsa-miR-181b	4287
hsa-miR-181b	2683
hsa-miR-181b	60468
hsa-miR-181b	9530
hsa-miR-181b	577
hsa-miR-181b	10458
hsa-miR-181b	23215
hsa-miR-181b	11176
hsa-miR-181b	29994
hsa-miR-181b	596
hsa-miR-181b	596
hsa-miR-181b	10018
hsa-miR-181b	607
hsa-miR-181b	9774
hsa-miR-181b	9774
hsa-miR-181b	8553
hsa-miR-181b	57448
hsa-miR-181b	57448
hsa-miR-181b	90427
hsa-miR-181b	651
hsa-miR-181b	659
hsa-miR-181b	54796
hsa-miR-181b	2186
hsa-miR-181b	23774
hsa-miR-181b	54014
hsa-miR-181b	54014
hsa-miR-181b	22903
hsa-miR-181b	22903
hsa-miR-181b	119504
hsa-miR-181b	56946
hsa-miR-181b	25758
hsa-miR-181b	25758
hsa-miR-181b	56935
hsa-miR-181b	80209
hsa-miR-181b	144809
hsa-miR-181b	51527
hsa-miR-181b	122525
hsa-miR-181b	91748
hsa-miR-181b	79768
hsa-miR-181b	79018
hsa-miR-181b	55731
hsa-miR-181b	79078
hsa-miR-181b	205327
hsa-miR-181b	151963
hsa-miR-181b	55435
hsa-miR-181b	54876
hsa-miR-181b	153222
hsa-miR-181b	153222
hsa-miR-181b	116843
hsa-miR-181b	729515
hsa-miR-181b	81688
hsa-miR-181b	345930
hsa-miR-181b	222166
hsa-miR-181b	222166
hsa-miR-181b	154743
hsa-miR-181b	11238
hsa-miR-181b	9254
hsa-miR-181b	799
hsa-miR-181b	801
hsa-miR-181b	811
hsa-miR-181b	818
hsa-miR-181b	84254
hsa-miR-181b	157922
hsa-miR-181b	23271
hsa-miR-181b	23125
hsa-miR-181b	65981
hsa-miR-181b	84433
hsa-miR-181b	10498
hsa-miR-181b	843
hsa-miR-181b	9139
hsa-miR-181b	863
hsa-miR-181b	868
hsa-miR-181b	8535
hsa-miR-181b	23492
hsa-miR-181b	23492
hsa-miR-181b	150275
hsa-miR-181b	149483
hsa-miR-181b	8030
hsa-miR-181b	92558
hsa-miR-181b	900
hsa-miR-181b	54619
hsa-miR-181b	8812
hsa-miR-181b	81669
hsa-miR-181b	9332
hsa-miR-181b	23607
hsa-miR-181b	920
hsa-miR-181b	969
hsa-miR-181b	996
hsa-miR-181b	8476
hsa-miR-181b	1012
hsa-miR-181b	64072
hsa-miR-181b	1024
hsa-miR-181b	8999
hsa-miR-181b	50937
hsa-miR-181b	1045
hsa-miR-181b	9425
hsa-miR-181b	1050
hsa-miR-181b	27443
hsa-miR-181b	1951
hsa-miR-181b	23527
hsa-miR-181b	23527
hsa-miR-181b	9662
hsa-miR-181b	9857
[truncated: 3,495 more rows]
