# Supplementary material for: Genome-Wide Maps of Circulating miRNA Biomarkers for Ulcerative Colitis
Source: PLoS One. 2012 Feb 16;7(2):e31241. doi: 10.1371/journal.pone.0031241 (PMC3281076; doi:10.1371/journal.pone.0031241)
Supplement: Table S7 — List of enriched GO and Pathway analysis terms and mRNA targets in each significant category. The percentage of overlap and the overlapping entities of the top groups/pathways ranked by the most significant p-values are shown. (XLS) [file pone.0031241.s014.xls]

## Sheet: GO
Table S7. Enriched categories of the top 25 Ontology groups
Ontology annotation	Ontology term	# Genome annotation	Overlap of gene annotation with genome annotation	Percent Overlap	p-value	Overlapping Genes
Oncogenes	Ariadne Ontology	273	83	30	2.52863e-11	TET2,TTC23,TET1,RAB39B,TET3,ECT2L,RAP1BL,FOS,JUN,SRC,MYB,CTTN,BCL2,ETS1,LYN,RHOA,CCND1,ADRB1,RAB11A,CXCL2,P4HB,ERBB4,KIT,KRAS,THRA,FYN,ERBB3,CBL,JUNB,KLF6,MAFB,CSF1R,EEF1A1,SET,RAP1A,AKT3,THRB,BMI1,RUNX1,MECOM,MAF,ETV6,RALA,PIM2,RHOC,GLI2,RAB3B,RAN,RRAS2,RAP1B,MYCL1,ETS2,RAB27A,RAB8B,FOXG1,RALB,VAV3,MAFG,RAP2A,SPAG9,CDON,RAB5B,CRKL,ELK1,RAB6B,YES1,RAB23,NET1,RAB35,ARHGEF12,MYBL1,MRAS,RAB22A,DDX6,…
Actin-based cytoskeleton assembly	Ariadne Ontology	202	65	32	2.7388e-10	ARPM1,CTTN,CFL1,VASP,MARCKS,DMD,PDLIM5,EPB41,ANK2,EZR,WASF2,ACTB,AHNAK,DBN1,KALRN,CD2AP,VCL,LDB3,SDC2,TAGLN,EPB49,EPB41L3,PLEK,ODF1,MSN,MYH10,GRLF1,WIPF1,SEPT9,RDX,PPP1R9B,FERMT2,PFN1,WASF1,ENAH,KLHL2,CORO1C,MTSS1,ADD3,MACF1,TPM3,ARPC1B,CIT,SORBS1,LCP1,MAP1A,SORBS3,MLLT4,AVIL,ABLIM1,ACTC1,ANK1,SHANK2,MYRIP,CDC42EP3,EPB41L2,NEBL,WIPF2,TLN2,SSX2IP,FNBP4,SEPT11,CORO2B,ARPC5,PDAP1
Transcription factors	Ariadne Ontology	955	203	21	1.32794e-08	RLF,MORF4L2,ZNF516,TSC22D2,TRANK1,TBC1D2B,MGA,PHF15,ZNF629,PHF20,OTUD4,MPHOSPH8,ZNF562,RCOR3,ZNF83,FEM1C,C11orf30,BBX,TULP4,PHTF2,ZNFX1,ZNF329,LIMD2,ZNF594,ZNF697,PHF21B,SMCR7,ZNF280B,ZNF664,C2orf67,C5orf41,JMJD8,CTNND1,TFAM,MYOG,CTNNBIP1,EP300,PPARGC1A,CREM,CREBBP,PROX1,NRIP1,ING4,FOXP1,PAWR,ZFPM2,ING1,BCL6,EED,MECOM,HMGB3,LMO1,AFF1,TSC22D3,BCL11A,PIAS3,VEZF1,EID1,CBFB,SALL4,ZBTB7A,MAML1,MLLT6,P…
Vesicular secretory pathway	Ariadne Ontology	93	33	35	5.69481e-07	STXBP5L,SNAP25,SNAP23,GOPC,SYT7,SCAMP1,FURIN,STXBP3,NSF,RAB3B,RAB27A,PCLO,AMPH,VAMP7,ITSN1,EPN2,SYP,SYN1,VAMP2,SYT4,EXOC5,SYT5,APBA2,STX3,RIMS2,SV2A,SYT9,AP2B1,SYT10,AP2M1,MYRIP,SYT6,SYT13
RAP-GEF	Ariadne Ontology	7	6	85	6.4023e-05	RAPGEFL1,RAPGEF4,RAPGEF2,RAPGEF6,RAPGEF1,RAPGEF5
Protein nucleus import	Ariadne Ontology	51	19	37	6.54788e-05	RAN,KPNB1,KPNA1,NUP50,NUP153,POM121,TMEM48,IPO7,TNPO2,KPNA4,IPO5,IPO9,TNPO1,KPNA3,IPO8,XPO7,KPNA6,NUPL1,AGFG2
RAP	Ariadne Ontology	5	5	100	7.08861e-05	RAP1A,RAP1B,RAP2A,RAP2B,RAP2C
MLCP	Ariadne Ontology	5	5	100	7.08861e-05	PPP1CA,PPP1R12A,PPP1CC,PPP1CB,PPP1R12B
TGFBR	Ariadne Ontology	16	9	56	0.000142825	TGFBR1,ACVR1B,ACVR2B,BMPR2,ACVR1,TGFBR3,BMPR1B,ACVR2A,BAMBI
Ca++ export	Ariadne Ontology	13	8	61	0.000145828	ATP2B2,SLC8A1,ATP2B1,ATP2B4,SLC24A4,SLC24A3,SLC8A3,ATP2B3
SEMA	Ariadne Ontology	20	10	50	0.00021951	SEMA4G,SEMA3A,SEMA3B,SEMA4D,SEMA4F,SEMA5A,SEMA3E,SEMA3C,SEMA6A,SEMA4C
MAP3K	Ariadne Ontology	20	10	50	0.00021951	MAP3K3,MAP3K5,MAP3K1,TAB2,ZAK,TAOK1,MAP3K11,MAP3K9,MAP3K10,TAB3
PAS domain	Ariadne Ontology	18	9	50	0.000458286	HIF1A,AHR,SIM1,CLOCK,NCOA2,EPAS1,NCOA1,SIM2,ARNT2
Endocytosis	Ariadne Ontology	59	19	32	0.000580318	SNX27,PICALM,CAV3,EPS15,NSF,CD2AP,CD163,STX12,AMPH,ITSN1,RAB5B,EPN2,APBA2,SNX17,DNAJC13,EHBP1,AP2B1,AP2M1,SYT6
Nuclear export	Ariadne Ontology	59	19	32	0.000580318	NXF5,SNHG3-RCC1,XPO1,RAN,RCC1,UPF2,NUP50,RANBP3,NUP153,NXF1,GLE1,UPF3B,POM121,TMEM48,AGFG1,XPO5,XPO7,NUPL1,AGFG2
Myc-Mad-Max	Ariadne Ontology	12	7	58	0.000615506	MAX,MYCL1,MXD1,MNT,MLX,MLXIP,MXD4
Endosomal recycling	Ariadne Ontology	26	11	42	0.000653172	RAB11A,SNAP25,NSF,STX12,ZFYVE20,RAB35,VAMP2,RAB11FIP4,RAB11FIP2,RAB11FIP5,RUFY1
Thr-like	Ariadne Ontology	19	9	47	0.000756897	PPARA,PPARD,THRA,NR1I2,THRB,RARB,RARA,RARG,RORB
SP	Ariadne Ontology	10	6	60	0.00128321	SP3,SP1,YY1,SP7,SP8,SP4
Cl- transport	Ariadne Ontology	77	22	28	0.00136947	SLC26A4,CLCN5,SLC4A1,SLC12A2,SLC4A10,SLC26A9,SLC4A3,SLC12A6,SLC12A5,SLC4A8,SLC6A8,SLC6A6,CLIC4,SLC6A1,SLC6A9,SLC17A7,CLIC1,SLC17A6,SLC17A8,GABRA1,GABRA4,CLIC5
Neurotransmitter uptake	Ariadne Ontology	25	10	40	0.0019165	SLC7A11,SLC1A1,SLC1A2,GRIK3,SLC6A8,SLC6A6,SLC6A1,SLC6A9,SLC1A4,SLC18A3
Phospholipid flipping	Ariadne Ontology	14	7	50	0.00203085	ATP9A,ATP8A2,ATP8B2,ATP11C,ATP8B1,ATP8A1,ATP11A
Src	Ariadne Ontology	5	4	80	0.00211455	SRC,LYN,FYN,YES1
E2F	Ariadne Ontology	8	5	62	0.00268118	E2F1,E2F3,E2F5,E2F2,E2F7
Na+ influx co-transport	Ariadne Ontology	96	25	26	0.00278378	SLC10A3,SLC10A4,SLC9A1,SLC8A1,SLC12A2,SLC4A10,SLC9A2,SLC4A5,SLC38A2,SLC1A1,SLC5A3,SLC4A8,SLC1A2,SLC22A5,SLC6A8,SLC24A4,SLC6A6,SLC24A3,SLC8A3,SLC6A1,SLC6A9,SLC1A4,SLC38A1,SLC38A4,SLC9A5
regulation of transcription	biological_process	1937	526	27	2.4135e-125	FOXN2,RLF,TCEA1,MORF4L2,ZNF516,ZBTB39,ZBTB40,PCGF3,ZBTB6,ZFP30,MGA,ZNF629,ATP1B4,ZZZ3,ZBTB44,BAZ2B,PHF20,MIER2,BNC2,ZNF770,ZNF654,RCOR3,C11orf30,BBX,PHTF2,SFMBT2,ZNF329,CSRNP2,ZNF644,ELOF1,ZNF594,TCEAL3,LBX2,ZNF697,C14orf43,ZBTB47,NACC1,ZNF618,MED12L,ZNF280B,ZNF664,ZSCAN29,ZNF827,ZNF746,MIER3,ZNF800,ZNF449,KIAA2018,ZNF498,SCML4,ZNF740,ZFP82,ZBTB41,ZBTB34,ZBTB8A,JUN,MYOD1,MYB,HIF1A,TP53,ETS1,ARRB1…
transcription	biological_process	2282	517	22	5.17846e-90	FOXN2,RLF,TCEA1,ZNF135,MORF4L2,ZNF516,ZBTB39,ZBTB40,PCGF3,ZBTB6,ZNF275,ZFP30,MGA,ZNF629,ATP1B4,ZZZ3,ZNF777,ZBTB44,BAZ2B,PHF20,MIER2,BNC2,ZNF562,ZNF770,ZNF654,RCOR3,C11orf30,BBX,PHTF2,ZNF286A,ZFP14,ZNF329,CSRNP2,ZNF644,ELOF1,ZNF594,TCEAL3,LBX2,ZNF697,C14orf43,ZBTB47,NACC1,ZNF618,MED12L,ZNF440,ZNF280B,ZNF664,ZSCAN29,ZNF563,ZNF827,ZNF746,MIER3,ZNF800,ZNF449,ZNF498,SCML4,ZNF740,ZFP82,ZBTB41,ZNF699,ZB…
multicellular organismal development	biological_process	1119	283	25	4.95969e-58	FBXW4,TLL2,EVI5,SPATA2,RUFY3,LENEP,NXF5,SEMA4G,KIAA1715,APOLD1,SIAH3,MYOD1,TNF,TP53,PICALM,SRF,MYOG,FLT1,JAG1,LIF,CTNNBIP1,SIRT1,CREM,EDN3,BMP2,MDK,MSX1,CDX2,ID2,RICTOR,MCL1,SIM1,SEMA3A,FYN,UBE2I,NEUROD1,NOTCH2,LCLAT1,PAX6,DBN1,TCF4,PROX1,NRP1,CUX1,MED1,EREG,PAX2,EPAS1,NTRK2,CSF1R,GAP43,LRP6,WNT4,FIGF,ADRA1B,HAND2,SNAI1,PHOX2B,HEY2,EBF1,RUNX1,CD164,MECOM,RELN,SOX6,HMGB3,LMO1,MEF2C,IKZF1,HMGA2,NR6…
positive regulation of transcription from RNA polymerase II promoter	biological_process	436	151	34	5.07703e-49	TCEA1,MORF4L2,CSRNP2,MAPK14,FOS,JUN,MYOD1,TNF,HIF1A,TP53,ETS1,ARRB1,TEAD1,NFAT5,FOXO1,SRF,E2F1,S1PR1,EGR1,MYOG,CTNNB1,LIF,ESR1,ESRRA,NR4A3,PPARA,KLF4,EP300,CREB1,PPARGC1A,FOXO3,MLL,GATA6,BMP2,SP1,CEBPD,MSX1,HES1,SMAD2,ACVR1B,THRA,KAT2B,LPIN1,NEUROD1,PAX6,CREBBP,TCF4,SMAD1,NRIP1,CLOCK,NCOA2,KLF6,MED1,MAFB,PAX2,EPAS1,NCOA1,HAND2,KAT5,ZFPM2,THRB,SMAD4,RARB,RUNX1,MECOM,SOX6,SOX4,MAF,MEF2C,NFIB,IKZF1,…
nervous system development	biological_process	474	155	32	1.17937e-46	RUFY3,RAPGEFL1,PCDHAC1,PCDHB6,PCDHAC2,PCDHA1,PCDHA11,PCDHA10,PCDHA8,PCDHA7,PCDHA6,PCDHA5,SEMA4G,SNX27,FOS,HBEGF,MBNL1,JAG1,BDNF,SCN2A,EP300,ANK2,MDK,PTEN,ERBB4,HES1,FGF5,PCSK2,ALK,SIM1,SEMA3A,NEUROD1,NOTCH2,AHNAK,MSI1,DBN1,NRP1,SLC1A2,PDE5A,VLDLR,KALRN,NTRK2,GAP43,PHOX2B,HEY2,MEF2C,SCN3A,NTRK3,HES5,SEMA3B,SEMA4D,HDAC9,ASCL1,LIMK1,SMARCA2,HDAC7,SOX11,EFNB2,L1CAM,ST8SIA4,BHLHE40,INSC,PCDHA2,EFNB1,D…
transport	biological_process	1787	347	19	1.33258e-42	ATP6V1G2,CACNB1,GRID1,XK,SLC10A3,STXBP5L,MON2,ATP1B4,AP4E1,CNNM3,SNX24,SDAD1,SVOP,NXT2,NXF5,CACHD1,NAPB,TTPAL,SLC35E1,FAM160A2,SLC10A7,HIATL1,MFSD5,FAM125B,CHMP7,CACNA2D4,RAB39B,TRAPPC6B,AP1S3,RIMS4,TOM1L2,MFSD4,CLVS1,SLC25A43,SLC35F1,SNX32,HEPHL1,NIPAL4,SLC6A17,MCART6,SLC9A1,ATP2C1,ATP2B2,SLC8A1,KCNMA1,SLC26A4,CLCN5,SLC4A1,AQP2,SLC9A6,KCNC1,KCNQ1,SLC12A2,ARF6,ARRB1,GJA3,SLC4A10,SLC2A4,ATP2B1,ATP…
cell differentiation	biological_process	720	170	23	6.05318e-31	TLL2,SPATA2,RUFY3,SEMA4G,APOLD1,SLC9A1,MYOD1,HIF1A,TP53,GNA13,RHOA,CTGF,CEBPA,CAV3,MYOG,CTNNB1,FLT1,JAG1,KLF4,SIRT1,PPARD,CREM,BMP2,MDK,KIT,CDX2,FRK,PAPPA,MCL1,SIM1,SEMA3A,NEUROD1,NOTCH2,PAX6,DBN1,GRB2,NRP1,EREG,PAX2,EPAS1,NTRK2,GAP43,WNT4,FIGF,HAND2,MECOM,MEF2C,ETV6,NR6A1,NTRK3,HES5,SEMA3B,SEMA4D,ASCL1,MKL2,ROBO2,GLI2,EID1,ZBTB7A,MITF,ODF1,BOLL,BMP8B,SH2B3,SOX11,EFNB2,SFRP1,L1CAM,HSPA2,C11orf9,C…
protein amino acid phosphorylation	biological_process	722	167	23	2.64519e-29	CSNK1G3,CDK19,SIK3,SCYL3,SGK269,LMTK3,PDIK1L,MAPK14,PRKCA,MAPK1,MAP2K1,ROCK1,SRC,MYOD1,MYLK,PRKCE,PRKCD,CFL1,LYN,PTK2,MAP2K4,CCND1,PAK1,MTOR,MAP3K3,TTN,RPS6KA3,AATK,FGFR1,MAP3K5,CAMK2G,WNK1,ADRBK1,FLT1,CDK6,ROCK2,TGFBR1,CREB1,IGF1R,PRKAA1,ATM,PIK3R1,ERBB4,KIT,NEK6,SMAD2,FRK,PIK3CA,ACVR1B,ALK,GRM5,FGFR3,FYN,PRKG1,ACVR2B,ERBB3,PDPK1,SMAD1,ITK,KALRN,NTRK2,CSF1R,TNNI3K,BMPR2,NUAK1,ACVR1,STK17A,TRIB3,…
negative regulation of transcription from RNA polymerase II promoter	biological_process	328	99	30	4.58228e-27	TNF,TP53,CEBPA,CALR,E2F1,EGR1,CTNNB1,CTNNBIP1,PPARD,MSX1,HES1,CDX2,ID2,UBE2I,TCF4,PROX1,NRIP1,NCOA2,CUX1,ENO1,PAX2,FOXP1,PAWR,SNAI1,ZFPM2,THRB,RARB,BCL6,BMI1,SOX6,HMGA2,RARA,MTDH,NR6A1,WHSC1,KLF12,HDAC9,DNMT3A,RARG,GLI2,EID1,FOXP2,HIPK2,SALL4,ZBTB7A,PRDM1,HDAC7,CBX2,SATB1,SUZ12,NR2F2,MECP2,KDM6B,HDAC4,VAX1,SUFU,DLX1,JARID2,KLF11,HEXIM1,MEIS2,PCGF2,RNF2,SALL2,DNAJB5,PRDM16,HOXC8,ZNF148,PHF21A,SIN3…
protein transport	biological_process	588	142	24	4.78862e-27	STXBP5L,MON2,AP4E1,SNX24,FBXO34,SDAD1,AP1AR,NXT2,NAPB,SNX27,FAM160A2,FAM125B,CHMP7,RAB39B,AP1S3,TOM1L2,SNX32,MTX3,ARF6,ARRB1,ARF3,RAB11A,HSP90B1,SNAP23,MYO1C,EPS15,GOPC,SCAMP1,STXBP3,NSF,XPO1,GOLT1A,VPS54,STX12,RAB3B,PDCD6IP,RAN,TAP2,TAP1,LRP1B,TNKS,MIA3,RAB27A,ZMAT3,RAB8B,CHMP2B,KPNB1,STXBP1,KPNA1,ZFYVE20,KDELR2,TOMM70A,NUP50,RANBP3,AP1G1,EIF5A2,VAMP7,NUP153,RAB5B,STX6,ATG9A,RAB3IP,RABIF,ATG10,R…
regulation of transcription, DNA-dependent	biological_process	1684	289	17	6.3235e-26	FOXN2,TCEA1,ZNF135,TSC22D2,ZNF275,ZFP30,MGA,ZNF777,BAZ2B,ZNF562,ZNF83,TULP4,ZNFX1,ZNF286A,ZFP14,RFX7,ZNF527,LBX2,ZNF440,ZSCAN29,ZNF563,C5orf41,ZNF746,ZNF449,ZNF498,ZFP82,ZNF699,ZNF862,FOS,JUN,MYOD1,MYB,HIF1A,TP53,ETS1,TEAD1,NFAT5,FOXO1,CEBPA,CALR,SRF,DDIT3,E2F1,EGR1,MYOG,CTNNB1,ESR1,ESRRA,NR4A3,PPARA,NR3C1,CTNNBIP1,EP300,CREB1,PPARD,CREM,SP3,FOXO3,MLL,GATA6,SP1,CEBPD,MSX1,PGR,HES1,CDX2,KLF5,SMAD2…
chromatin modification	biological_process	249	77	30	4.55948e-22	MORF4L2,C11orf30,NR3C1,MLL,ING4,KAT5,WDR5,BMI1,EED,IKZF1,WHSC1,HDAC9,DNMT3A,HDAC3,MYST3,CARM1,HDAC7,CBX2,SATB1,SMARCA1,SUZ12,KDM6B,CHD7,BAP1,HDAC4,JARID2,TRRAP,KDM3A,SMARCC1,RBBP4,CHD1,MYST4,L3MBTL3,TLK2,KDM4A,CBX7,PHF21A,BAZ2A,SATB2,TBL1XR1,SETD7,ING5,BRD1,KDM5C,ARID1A,RBBP7,KDM5B,SUDS3,PBRM1,SS18L1,KDM5A,EYA2,MYST2,RCOR1,MORF4L1,WHSC1L1,MLL2,EPC1,MLL3,ASH1L,RBL1,EPC2,SUV420H1,CBX6,AEBP2,CECR2,P…
positive regulation of transcription	biological_process	211	69	32	1.93828e-21	FOS,MAPK1,JUN,MYOD1,TNF,HIF1A,TP53,ETS1,PICALM,FOXO1,CEBPA,SRF,DDIT3,EGR1,CTNNB1,PPARA,TGFBR1,PPARGC1A,GATA6,BMP2,KLF5,SMAD2,KAT2B,CREBBP,NR1I2,ACVR1,NCOA1,KAT5,ING1,SMAD4,EBF1,RUNX1,MEF2C,IKZF1,NR5A2,RARA,RPS6KA1,TCF12,MKL2,GLI2,MYST3,RXRA,DCP1A,CAMKK2,NR2F2,FOXO4,ETV5,CREB3L2,KDM3A,EBF2,POU2F2,TBX1,GDF6,MYST4,RFC1,YWHAH,ETV1,ELK1,FOSL2,TBX5,ING5,SIX4,GLIS2,KDM5A,ZNF423,EBF3,ARNT2,SERTAD2,ZXDC
heart development	biological_process	191	65	34	2.50225e-21	ADM,CASP3,TEAD1,PDLIM5,SOD2,SRF,SHC1,CTNNB1,ADRBK1,EDNRA,GNAQ,PPARA,TGFBR1,EP300,ATM,PPARD,BMP2,MSX1,PTEN,ERBB4,RAPGEF4,ID2,SMAD2,CALCRL,ACVR2B,ERBB3,PROX1,NRP1,ITGA3,MED1,VLDLR,ACVR1,FOXP1,ADAM19,HAND2,ZFPM2,SOX4,PTPRJ,MEF2C,HDAC9,GJC1,MKL2,GLI2,SALL4,RXRA,NF1,MAP2K5,PITX2,ISL1,HEXIM1,RB1CC1,TBX1,SEMA3C,TP53BP2,CRKL,PKP2,PPP3R1,TBX5,PAM,PBRM1,ECE2,NIPBL,DVL3,SHOX2,FOXP4
apoptosis	biological_process	664	140	21	9.76349e-21	ZNF346,C16orf5,CSRNP2,RAC1,ROCK1,TNF,TNFRSF1B,CASP3,BCL2,AQP2,TP53,ARF6,SOS1,CASP2,PAK1,SOD2,E2F1,AATK,MAP3K5,TNFRSF11B,BCL2L11,CTNNB1,PDCD4,CYCS,TIAM1,SCN2A,EP300,XIAP,ATM,SIRT1,MTCH1,PPARD,FOXO3,MLL,GATA6,PTEN,RNF34,NEK6,AHR,HTRA2,MCL1,GADD45A,SEMA3A,BBC3,TP53INP1,NTN1,IL1A,BRCA1,ING4,BCL2L2,KALRN,BAG1,BMF,STK17A,PAWR,HAND2,TRIB3,BNIP3L,MECOM,MEF2C,BIRC6,PHLDA1,PIM2,DAPK2,GLI2,HIPK2,STK4,RASSF5…
axon guidance	biological_process	112	46	41	2.91859e-19	RAC1,VASP,BDNF,SEMA3A,PAX6,NTN1,NRP1,GAP43,RELN,RUNX3,EPHA4,SEMA3B,ROBO2,GLI2,L1CAM,PGRMC1,MYH10,DCC,CDK5R1,EFNB1,VAX1,DLX5,SEMA4F,USP33,NRCAM,SEMA5A,EPHB3,EFNA5,CHL1,ETV1,DPYSL5,EFNB3,NRXN1,UNC5A,OTX2,CNTN4,ABLIM1,SEMA6A,NFASC,DPYSL3,LMX1A,TBR1,PLXNA3,APBB2,LMTK2,NRXN3
brain development	biological_process	198	63	31	5.14846e-19	H3F3C,ATP2B2,ATP2B1,CTNND1,FGFR1,S1PR1,KCNK3,HCN2,IGF1R,ATM,SLC7A11,IRS2,THRA,AGTR2,PAX6,PROX1,BRCA1,STXBP3,MED1,PFKFB3,HSPG2,BMI1,RELN,XRCC5,BCR,ROBO2,ACSL3,CCNG1,NF1,MYH10,SMARCA1,CDK5R1,MECP2,DCX,EOMES,VAX1,FOXG1,EFNA5,DCLK1,RORB,NNAT,BPTF,TPM3,DPYSL2,ZFHX3,ECE2,ZIC2,CNTNAP2,ABR,NIPBL,LPHN2,CNTN4,CADM2,LMX1A,TBR1,ALX1,LPHN1,ATP2B3,HMGCS1,AFF2,CLN5,RPGRIP1L,DSCAML1
in utero embryonic development	biological_process	221	67	30	7.10175e-19	WDTC1,MYB,TP53,GNA13,MBNL1,TTN,SRF,FGFR1,BCL2L11,CTNNB1,EDNRA,UBE2B,TGFBR1,PLCG1,SP3,GATA6,BMP2,SP1,MSX1,HES1,SMAD2,ACVR1B,SRSF1,GRIN2B,JUNB,MED1,ENO1,ACVR1,TGFBR3,HAND2,ZFPM2,PDGFRA,SMAD4,BMI1,RUNX1,MECOM,SOX6,RPA1,MKL2,SOX5,GLI2,SALL4,PRDM1,PITX2,MYH10,CHD7,CUL3,MAFG,PCGF2,SIN3A,AMOT,ZMIZ1,ZFAND5,APBA2,NMT1,RDH10,ALS2,MYO1E,MLL2,ARNT2,ELL,PITPNB,GATAD2A,TSHZ3,RPGRIP1L,TAPT1,ETNK2
transcription from RNA polymerase II promoter	biological_process	228	68	29	1.03291e-18	TCEA1,FOS,JUN,ETS1,ARRB1,NFAT5,CEBPA,PPARA,NR3C1,CREB1,MLL,CEBPD,CDX2,KLF5,AHR,THRA,PAX6,JUNB,MED1,PAX2,MAX,EPAS1,BMPR2,RUNX3,MAF,DTX1,TBPL1,SOX5,CBFB,TAF4B,CCNK,LMO4,FOXO4,NKX3-2,MNT,KLF11,FUBP1,SUPT16H,ARID4A,POU2F2,TARDBP,TCERG1,NFE2L1,POU4F1,KLF13,ETV1,FOSL2,HLF,TRPS1,KDM5A,ZFHX3,NFYA,MLLT1,CCNT2,TAF4,TMF1,AFF4,PRDM4,ALX1,NFIX,ASH1L,COPS2,LCOR,NFX1,CREB5,BATF3,THRAP3,GMEB2
positive regulation of transcription, DNA-dependent	biological_process	183	59	32	3.311e-18	TCEA1,TP53,ETS1,E2F1,EGR1,CTNNB1,ESRRA,EP300,PPARGC1A,MLL,SP1,PGR,CDX2,SMAD2,AHR,KLF15,CREBBP,TCF4,PROX1,BRCA1,NRIP1,KAT5,SMAD4,E2F3,MECOM,SOX6,SOX4,AFF1,TCF3,MAP2K3,HIPK2,MITF,RAN,ESRRG,C11orf9,ETS2,SOX7,MECP2,PAX8,SMARCC1,TBX1,TFEB,PRDM16,SEC14L2,ELK1,FOXK1,TBX5,ILF3,FOXF2,TFAP4,NFYA,NAA15,DVL3,CREB5,FOXJ2,SERTAD2,TMX1,JHDM1D,ATXN7L3
interspecies interaction between organisms	biological_process	304	80	26	3.99196e-18	MAPK1,SRC,EIF4E,TP53,LYN,RHOA,VIM,CEBPA,CD4,MAP3K5,CLDN1,EP300,CREB1,SIRT1,PLCG1,PIK3R1,SP1,TFRC,FYN,KAT2B,UBE2I,CREBBP,GRB2,IL16,IL2RB,KAT5,BNIP3L,CD93,XPO1,HNRNPA1,IL2RG,MFGE8,RALA,CARM1,RXRA,PDCD6IP,RAN,TAP2,TAP1,EFNB2,RBM15,SATB1,ITCH,BTRC,KPNB1,DDX3X,RTN3,KPNA1,PAK2,SGTA,POLA1,ATF7,KDM4A,NXF1,CUL5,PACS2,TRIM25,YWHAE,DERL1,EFNB3,USP7,RAB11FIP4,VAPB,RCOR1,TBC1D20,IPO7,CCNT2,TAF4,RRAGA,ATP6V1H,…
regulation of transcription from RNA polymerase II promoter	biological_process	305	80	26	4.92804e-18	TCEA1,MED12L,FOS,MYOD1,TP53,ETS1,RHOA,FOXO1,SOD2,PPARD,SP1,KLF9,YY1,SMAD1,BRCA1,CLOCK,JUNB,CUX1,MED1,MAFB,FOXK2,SNAI1,ZFPM2,SP7,THRB,HEY2,SMAD4,VEZF1,TCF12,KLF12,IKZF3,SMARCA2,RXRA,PRKAR1A,NR2F2,SOX7,CTDSP1,MTF1,HOXA1,SMARCC1,UBP1,PFN1,MNX1,CHD1,TBX1,UHRF1,POU4F1,TFAP2B,MED17,FOSL2,FOXK1,ABCA2,ZHX2,POU2F3,GLIS2,MED14,MED26,CREG1,PKNOX1,OTX2,TFAP4,NFYA,ERF,TAF4,TRAK2,RAI1,JMY,MED19,TCF19,BRWD1,TBL…
intracellular signaling pathway	biological_process	385	92	23	1.20961e-17	NUDT4,TULP4,PLCXD3,SHC4,PRKCA,MAPK1,RAC1,ROCK1,CASP3,PRKCE,PRKCD,LYN,CTGF,LEP,SHC1,ADCY6,TIAM1,ROCK2,PLCG1,RASA1,IGFBP5,RAPGEF4,SOCS3,SMAD2,SMAD7,SOCS2,PDPK1,ITK,KALRN,PIKFYVE,PDK1,BCR,PLEK,RASSF5,RAPGEF2,SH2B3,CBLB,PLXNB1,PRKAR1A,KSR1,DCX,PLCB4,VAV3,DLG5,PPP1R1B,RGS6,DCLK1,TNS3,TLK2,ITSN1,CRKL,ADCY1,WSB1,NET1,ARHGEF7,CIT,YWHAE,ARHGEF12,KSR2,SOCS6,CDC42BPA,DGKG,PDZD2,ADCY9,SOCS5,CDC42BPB,ABR,LAT2…
negative regulation of transcription, DNA-dependent	biological_process	141	50	35	1.35964e-17	CTNNB1,KLF4,MSX1,PGR,ID2,SMAD2,UBE2I,ING4,ENO1,SMAD4,MECOM,SOX6,HES5,HDAC9,SOX5,ZBTB7A,HDAC7,BHLHE40,MECP2,SIN3B,HDAC4,PAX9,JARID2,FOXG1,KLF11,ARID4A,TNP1,PRDM16,ARID5B,SIN3A,FOXK1,TBL1XR1,ZHX2,FOXN3,ILF3,FOXF2,KDM5B,TRPS1,MLX,CBFA2T2,PURA,PURB,TBL1X,SPEN,IKZF4,GATAD2A,CUX2,BAHD1,ZHX1,HIC2
cell proliferation	biological_process	419	97	23	1.53979e-17	EVI5,CCDC92,MAP2K1,RAC1,TGFA,SRC,TNF,TNFRSF1B,ELN,BCL2,TP53,GNAI2,E2F1,CTNNB1,EDNRA,TACC2,CTNNBIP1,PPARD,PTEN,ERBB4,KIT,EPS15,CYP1A1,IRS2,FGF5,KITLG,UCN2,FURIN,CREBBP,IL1A,S100B,EREG,PROK2,CSF1R,CYR61,FIGF,ADRA1B,TXNRD1,SMAD4,RUNX3,XRCC5,LMO1,NR6A1,PTCH1,PIM2,CKS1B,GLI2,CDC27,SOX11,LIPG,RAP1B,GNG2,MYH10,CDK5R1,MXD1,CBFA2T3,PRKAR1A,EPS8,APPL1,NUMB,DLX5,TACC1,TBX1,UHRF1,POLA1,ZAK,EMP1,CUL5,MAPRE1,F…
metal ion binding	molecular_function	3461	651	18	3.4935e-50	FNTB,RLF,TCEA1,TLL2,ZNF135,ZNF516,RNF144A,ZBED4,ZBTB39,ZBTB40,ATP9A,PCGF3,ZBTB6,ZNF275,NUDT4,ADAMTS6,CA5B,ZFP30,RNF44,RUFY3,ZNF609,ZCCHC14,ZC3H4,DTX4,KIAA1045,PHF15,ZNF629,SIK3,ZNF346,ZZZ3,ZNF777,ZC3H7A,ZBTB44,BAZ2B,PRICKLE4,PHF20L1,PHF20,ATP8A2,RBM27,ZFAND6,FBXL19,BNC2,ZNF562,TET2,RNF43,IMPAD1,ZNF770,SOBP,UBR7,ARMC1,ZNF654,GALNT10,RNF126,ZNF83,ATP8B2,ZNFX1,ZNF286A,RNF150,RIMKLB,ZFP14,ZFYVE28,RBM…
nucleotide binding	molecular_function	2265	462	20	1.50326e-43	CSNK1G3,HSPA13,UBE2G1,GTPBP1,KIAA0232,RHOBTB1,FAM20B,ATP9A,RBM12,MYO16,CDK19,PPIP5K2,SIK3,SHPK,UBE2D4,ATP8A2,RBM27,DIRAS2,UBE2W,IARS2,NXF5,ATP8B2,ZNFX1,RIMKLB,UBE2O,RBM26,IPPK,YTHDC2,SGK269,CPSF7,MYO19,CCDC92,DDX59,RASL10B,LMTK3,RAB39B,KIF19,CPEB2,PDIK1L,GK5,HSPA12A,RIMKLA,ATP11C,PABPC1L2A,KIAA2022,KIF24,FIGNL2,RAP1BL,ATP2C1,MAPK14,PRKCA,MAPK1,MAP2K1,RAC1,ROCK1,SRC,MYLK,ATP2B2,CLCN5,PRKCE,PRKCD,G…
transcription factor activity	molecular_function	1215	297	24	1.53149e-42	FOXN2,RLF,ZNF135,TSC22D2,MGA,ZNF83,TULP4,ZNFX1,CSRNP2,LBX2,ZSCAN29,C5orf41,ZNF449,ZNF498,FOS,JUN,MYOD1,MYB,HIF1A,TP53,ETS1,TEAD1,NFAT5,FOXO1,CEBPA,SRF,DDIT3,E2F1,TFAM,EGR1,MYOG,CTNNB1,ESR1,ESRRA,NR4A3,PPARA,MMP14,NR3C1,KLF4,EP300,CREB1,PPARD,CREM,SP3,FOXO3,MLL,GATA6,SP1,CEBPD,MSX1,PGR,HES1,CDX2,KLF5,KLF9,SMAD2,AHR,YY1,THRA,SIM1,SMAD7,NEUROD1,KLF15,PAX6,CREBBP,TCF4,EGR3,PROX1,SMAD1,NR1I2,CLOCK,CBL…
DNA binding	molecular_function	2430	476	19	4.88569e-40	FOXN2,TCEA1,ZNF516,ZBED4,ZBTB39,TRANK1,ZBTB40,ZBTB6,ZNF275,ZFP30,MGA,ZNF629,ABTB2,ZZZ3,ZNF777,ZBTB44,BAZ2B,PHF20,ZFAND6,MIER2,FBXL19,BNC2,ZNF562,ZNF770,ZNF654,RCOR3,LENEP,BBX,PHTF2,ZNF286A,PRR12,TNRC18,ZFP14,PAPD5,RFX7,ZNF329,TET1,CSRNP2,THAP2,ZNF644,ZNF527,ZNF594,LBX2,ZNF697,C14orf43,ZBTB47,ZNF618,ZNF440,ZNF280B,ZNF664,ZNF563,ZNF827,MIER3,ZNF800,KIAA2018,SCML4,ZFP82,C5orf51,ZBTB41,ZNF699,ZBTB34,…
kinase activity	molecular_function	783	207	26	1.09121e-34	CSNK1G3,FAM20B,CDK19,PPIP5K2,SIK3,SHPK,SCYL3,IPPK,SGK269,LMTK3,MOBKL2C,PDIK1L,GK5,MAPK14,PRKCA,MAPK1,MAP2K1,ROCK1,SRC,MYLK,PRKCE,PRKCD,LYN,PTK2,MAP2K4,CCND1,PAK1,PLAU,MTOR,MAP3K3,CDKN1A,RPS6KA3,AATK,FGFR1,MAP3K5,CAMK2G,WNK1,ADRBK1,FLT1,CDK6,ROCK2,TGFBR1,IGF1R,PRKAA1,ATM,PIK3R1,ERBB4,KIT,NEK6,FRK,PIK3CA,ACVR1B,ALK,FGFR3,FYN,PRKG1,ACVR2B,ERBB3,PDPK1,PRKAG2,ADK,ITK,AKAP6,PFKFB3,KALRN,NTRK2,CSF1R,TNN…
transferase activity	molecular_function	1547	325	21	1.39509e-32	CSNK1G3,FNTB,TBC1D25,FAM20B,CDK19,PPIP5K2,SIK3,SHPK,ST6GALNAC4,GALNT10,AGPAT4,PAPD5,IPPK,METTL4,METT10D,GLT25D1,SGK269,TRMT2B,ZDHHC18,LMTK3,PCMTD1,NAA30,MBOAT2,PDIK1L,MBOAT1,GK5,GXYLT1,PTAR1,NSUN4,MAPK14,PRKCA,MAPK1,MAP2K1,ROCK1,SRC,MYLK,PRKCE,PRKCD,LYN,PTK2,MAP2K4,PAK1,MTOR,MAP3K3,TTN,RPS6KA3,AATK,FGFR1,MAP3K5,CAMK2G,WNK1,ADRBK1,FLT1,CDK6,ROCK2,TGFBR1,EP300,GPAM,IGF1R,PRKAA1,ATM,MLL,BCAT2,CPT1A,…
zinc ion binding	molecular_function	2977	523	17	5.37844e-31	FNTB,RLF,TCEA1,TLL2,ZNF135,ZNF516,RNF144A,ZBED4,ZBTB39,ZBTB40,PCGF3,ZBTB6,ZNF275,ADAMTS6,CA5B,ZFP30,RNF44,RUFY3,ZNF609,ZCCHC14,ZC3H4,DTX4,KIAA1045,PHF15,ZNF629,ZNF346,ZZZ3,ZNF777,ZC3H7A,ZBTB44,BAZ2B,PRICKLE4,PHF20L1,PHF20,RBM27,ZFAND6,FBXL19,BNC2,ZNF562,RNF43,ZNF770,SOBP,UBR7,ZNF654,RNF126,IARS2,ZNF83,ADAMTSL3,ZNFX1,ZNF286A,RNF150,ZFP14,VAT1L,ZFYVE28,AGBL5,RBM26,UNKL,ZNF329,TRIM46,TET1,LIMD2,RNF1…
transcription activator activity	molecular_function	329	108	32	1.00203e-26	JUN,MYOD1,MYB,TNF,BCL2,TP53,ETS1,TEAD1,FOXO1,CEBPA,E2F1,EGR1,MYOG,CTNNB1,NR4A3,PPARA,NR3C1,KLF4,EP300,PPARGC1A,PPARD,SP3,FOXO3,GATA6,BMP2,SP1,PGR,ID2,SMAD2,THRA,NEUROD1,CREBBP,SMAD1,BRCA1,JUNB,KLF6,MED1,HAND2,ING1,SMAD4,RARB,E2F3,RUNX1,SOX4,MAF,MEF2C,AFF1,NFIB,NR5A2,RARA,TCF3,TCF12,GLI2,IKZF2,HNRNPD,MYST3,MITF,SMARCA2,SOX11,ESRRG,ETS2,NR2F2,PAX8,FOXO4,EOMES,ETV5,HDAC4,DLX5,MEF2D,TBX1,MYST4,PRDM16…
protein kinase activity	molecular_function	565	150	26	1.55167e-25	CSNK1G3,CDK19,SIK3,SCYL3,SGK269,LMTK3,PDIK1L,MAPK14,PRKCA,MAPK1,MAP2K1,ROCK1,SRC,MYLK,PRKCE,PRKCD,LYN,PTK2,MAP2K4,CCND1,PAK1,MAP3K3,RPS6KA3,AATK,FGFR1,MAP3K5,CAMK2G,WNK1,ADRBK1,FLT1,CDK6,ROCK2,TGFBR1,IGF1R,PRKAA1,ATM,ERBB4,KIT,NEK6,FRK,ACVR1B,ALK,FGFR3,FYN,PRKG1,ACVR2B,ERBB3,PDPK1,ITK,KALRN,NTRK2,CSF1R,TNNI3K,BMPR2,NUAK1,ACVR1,TRIB3,AKT3,HK1,EEF2K,MARK1,PDK1,PDGFRA,EPHA4,SNRK,MAPK10,MAP2K3,NTRK3,…
sequence-specific DNA binding	molecular_function	717	166	23	3.03434e-21	FOXN2,LBX2,C5orf41,FOS,JUN,HIF1A,BCL2,TP53,ETS1,FOXO1,CEBPA,SRF,DDIT3,E2F1,EGR1,ESR1,ESRRA,NR4A3,PPARA,NR3C1,KLF4,CREB1,PPARD,CREM,FOXO3,GATA6,SP1,CEBPD,MSX1,PGR,CDX2,AHR,THRA,NEUROD1,PAX6,NR1I2,JUNB,CUX1,MAFB,PAX2,MAX,EPAS1,FOXJ1,FOXP1,FOXK2,SNAI1,THRB,PHOX2B,SMAD4,BACH2,RARB,BCL6,SOX6,MAF,MEF2C,BACH1,IKZF1,NR5A2,RARA,ETV6,NR6A1,TCF3,ASCL1,RARG,GLI2,FOXP2,MITF,E2F5,HOXB3,RXRA,SATB1,PITX2,RXRB,ES…
transcription regulator activity	molecular_function	440	117	26	3.16921e-20	TCEA1,MGA,BAZ2B,KIAA2018,MAPK1,MYOD1,MYB,HIF1A,MYOG,ESR1,NR3C1,MSX1,NEO1,PGR,HES1,CDX2,KLF9,ID2,AHR,THRA,SIM1,NEUROD1,PAX6,TCF4,PROX1,BRCA1,CLOCK,NCOA2,CUX1,MAX,EPAS1,NCOA1,HAND2,SP7,PHOX2B,HEY2,EBF1,RARA,TCF3,HES5,TCF12,DTX1,ASCL1,MITF,HOXB3,RXRA,TFEC,PITX2,BAZ1A,MYCL1,SMARCA1,MXD1,BHLHE40,HOXD3,HOXA11,NHLH2,NKX3-2,VAX1,DLX1,DLX5,ISL1,MNT,LHX3,NEUROD4,SIX2,HOXA1,EBF2,MNX1,POU2F2,HBP1,HOXA4,TFEB,…
transcription repressor activity	molecular_function	252	81	32	9.84765e-20	JUN,TNF,TP53,CEBPA,CALR,KLF4,SIRT1,PPARD,SP3,MSX1,HES1,ID2,THRA,NR1I2,NCOA2,CUX1,ENO1,FOXP1,SNAI1,KAT5,THRB,BCL6,BMI1,EED,IKZF1,RARA,HDAC9,FOXP2,HDAC3,ZBTB7A,HDAC7,CBX2,SATB1,BHLHE40,GRLF1,SOX7,MECP2,BCLAF1,HDAC4,PAX9,JARID2,FOXG1,HEXIM1,ARID4A,RNF2,SALL2,MYST4,ZEB2,PRDM16,HOXC8,ARID5B,ZNF148,KDM4A,E2F7,FOXK1,SIM2,ATXN1,NAB1,FOXN3,ILF3,RBBP7,KDM5B,RBAK,ZNF238,TRPS1,HOXB8,ZFHX3,TFAP4,ZNF423,NIPBL,…
ATP binding	molecular_function	1835	325	17	2.10774e-19	CSNK1G3,HSPA13,UBE2G1,KIAA0232,TRANK1,FAM20B,ATP9A,MYO16,CDK19,PPIP5K2,SMCHD1,SIK3,SHPK,UBE2D4,ATP8A2,UBE2W,IARS2,SCYL3,ATP8B2,ZNFX1,RIMKLB,UBE2O,IPPK,YTHDC2,SGK269,MYO19,CCDC92,ITM2C,DDX59,LMTK3,KIF19,PDIK1L,GK5,HSPA12A,RIMKLA,ATP11C,KIF24,FIGNL2,ATP2C1,MAPK14,PRKCA,MAPK1,MAP2K1,ROCK1,SRC,MYLK,ATP2B2,CLCN5,PRKCE,TP53,PRKCD,LYN,ATP2B1,ATP2B4,PTK2,MAP2K4,PAK1,MTOR,MAP3K3,TTN,HSP90B1,RPS6KA3,AATK,F…
transcription factor binding	molecular_function	230	74	32	3.56221e-18	DIP2B,SLC9A1,MAPK1,JUN,MYOD1,HIF1A,BCL2,TP53,ETS1,ARRB1,CEBPA,SRF,E2F1,CTNNB1,ESR1,EP300,CREB1,PPARGC1A,GATA6,SMAD2,AHR,THRA,KAT2B,AGTR2,UBE2I,NEUROD1,CREBBP,CLOCK,MAFB,EPAS1,HAND2,KAT5,ZFPM2,RUNX1,TCF3,RPS6KA1,TRIB2,HDAC9,STK4,HDAC3,MYST3,E2F5,HDAC7,PITX2,DCP1A,E2F2,MECP2,YWHAZ,INSIG2,LMO4,FOXO4,HDAC4,SUFU,MYST4,NLK,PBX2,SIN3A,BPTF,TBX5,FOXF2,MLX,SORBS3,CREG1,PURA,PURB,RBL1,APBB2,TBL1X,LCOR,RBM9…
transcription corepressor activity	molecular_function	179	59	32	2.58501e-15	DDIT3,E2F1,SIRT1,CDX2,YY1,TCF4,SRSF2,PROX1,NRIP1,JUNB,ENO1,PAWR,TRIB3,ZFPM2,THRB,RARA,BCL11A,KLF12,HDAC9,EID1,HIPK2,HDAC3,HDAC7,TFEC,MXD1,YWHAB,GRLF1,NR2F2,MECP2,SIN3B,HDAC4,SUFU,MNT,UBP1,MEIS2,SF1,SIN3A,BASP1,TBL1XR1,KDM5B,CREG1,CBFA2T2,HIPK1,TOB1,HR,ERF,JAZF1,ALX1,MAP3K10,COPS2,TLE4,TBL1X,SPEN,MXD4,RBM9,BATF3,AEBP2,TAF9B,CBX4
protein serine-threonine kinase activity	molecular_function	542	121	22	1.43503e-14	CSNK1G3,CDK19,SIK3,LMTK3,PDIK1L,MAPK14,PRKCA,MAPK1,MAP2K1,ROCK1,MYLK,PRKCE,PRKCD,MAP2K4,PAK1,MTOR,MAP3K3,TTN,RPS6KA3,AATK,MAP3K5,CAMK2G,WNK1,ADRBK1,CDK6,ROCK2,TGFBR1,PRKAA1,ATM,NEK6,ACVR1B,PRKG1,ACVR2B,PDPK1,KALRN,TNNI3K,BMPR2,NUAK1,ACVR1,STK17A,AKT3,EEF2K,MARK1,BCR,SNRK,MAPK10,MAP2K3,RPS6KA1,PIM2,MAP3K1,DAPK2,HIPK2,STK4,LIMK1,LATS2,MAP2K5,MAPK4,PAK4,CAMKK2,KSR1,BMPR1B,DYRK1A,CDK16,PAK2,PKN2,ACVR…
chromatin binding	molecular_function	226	66	29	4.52233e-14	MPHOSPH8,TP53,CTNNB1,NR3C1,SP3,MLL,GATA6,SMAD2,CREBBP,NCOA2,CUX1,MED1,FOXP1,NCOA1,KAT5,SMAD4,BCL6,BMI1,EED,RPA1,WHSC1,DNMT3A,GLI2,HDAC3,MITF,HDAC7,RAN,CBX2,PITX2,SUZ12,SIN3B,CHD7,MKRN1,BAP1,RCC1,DLX1,JARID2,ISL1,MNT,SMARCC1,PCGF2,ARID4A,CHD1,SMC1A,RNF2,POLA1,CBX7,PBX2,CBX1,SIN3A,SATB2,PBRM1,KDM5A,MORF4L1,BAZ1B,PHC1,NPTXR,TLE4,TBL1X,CDYL,CBX6,CHD6,BAHD1,CBX4,CAMTA2,CHD9
promoter binding	molecular_function	141	49	34	5.83316e-14	FOS,JUN,TNF,TP53,ARRB1,CEBPA,CTNNB1,KLF4,EP300,GATA6,SP1,CEBPD,HES1,SMAD2,YY1,THRA,SMAD7,PAX6,PROX1,PAX2,MAX,HAND2,SMAD4,SOX6,XRCC5,IKZF1,NR5A2,RARA,TCF3,TCF12,SOX5,GLI2,RXRA,RXRB,NR2F2,SOX7,ETV5,HDAC4,CREB3L2,DLX5,TFEB,BASP1,TBL1XR1,ZFHX3,TCF20,TFAP4,TAF2,MLL2,TBL1X
protein heterodimerization activity	molecular_function	317	82	25	7.38905e-14	SGTB,RALGAPB,FOS,JUN,VAPA,HIF1A,BCL2,TP53,CEBPA,BCL2L11,KCNK3,PPARA,NR3C1,TGFBR1,PPARD,BMP2,CEBPD,ID2,AHR,MCL1,THRA,SIM1,NEUROD1,NOTCH2,ERBB3,GRIN2B,TCF4,BCL2L2,JUNB,ITGA3,ENO1,MAX,EPAS1,FOXP1,HAND2,PPP3CA,PDK1,BNIP3L,PDGFRA,RUNX1,SOX6,MAF,IKZF1,RARA,TCF3,SOX5,ROBO2,FOXP2,IKZF3,IKZF2,LIMK1,RXRA,TAP2,TAP1,RXRB,SMC1A,AMPH,TFEB,GCLM,SGTA,POLA1,SIM2,CAPNS1,MLX,TPD52,LSM5,VAPB,PKNOX1,OTX2,TFAP4,PDSS1,…
protein C-terminus binding	molecular_function	184	56	30	5.71135e-13	SGTB,MAPK14,SRC,ATP2B2,SLC4A1,TP53,PRKCD,VIM,CAV3,CTNNB1,KCNK3,TJP1,PRKAA1,MYO1C,SIRT1,PIK3R1,SP1,SDC1,UBE2I,TCF4,HSPG2,NSF,TNNI3K,XRCC5,PIAS3,PRDX3,LIMK1,YWHAB,A2BP1,AMPH,MAP2K7,MAPRE1,BAIAP2,ATXN1,MAGI1,FOXN3,CEP135,USP7,MLLT4,SNX17,ARL6IP5,TFAP4,NIPBL,PEX5,TRIM3,PEX12,MIF4GD,BAT2L2,DLG2,FIGN,TBL1X,KPNA3,HPCAL4,HSPB7,LRRC7,HIC2
nucleic acid binding	molecular_function	1483	249	16	2.41927e-12	TCEA1,ZNF135,ZBTB39,ZBTB40,RBM12,ZBTB6,ZNF275,TDRKH,ZFP30,ZCCHC14,ZC3H4,ZNF629,ZNF346,ZNF777,ZC3H7A,ZBTB44,PHF20L1,PHF20,RBM27,ZNF770,ZNF83,ZNF286A,ZFP14,RBM26,UNKL,YTHDC2,METTL4,ZNF329,CPSF7,DDX59,THAP2,ZNF594,ZCCHC3,UNK,ZNF697,ZC3HAV1L,ZBTB47,LENG9,LARP4,ZNF831,CPEB2,DNAJC21,ZNF664,ZSCAN29,ZNF563,RBM33,ZNF746,EXD1,ZNF449,ZNF498,ZNF740,ZFP82,SFRS12IP1,KIAA2022,ZBTB41,ZC3H6,ZBTB34,ZNF862,MBNL1,EG…
transcription coactivator activity	molecular_function	223	62	27	2.85005e-12	JUN,MYOD1,CTNNB1,EP300,PPARGC1A,PPARD,YY1,KAT2B,LPIN1,CREBBP,BRCA1,NR1I2,NRIP1,NCOA2,ING4,JUNB,MED1,MAX,EPAS1,NCOA1,HAND2,KAT5,RARA,DTX1,TBPL1,MKL2,CBFB,MYST3,MAML1,CARM1,SMARCA2,RXRA,TFEC,RAN,RXRB,DCC,MTF1,NR2C2,MNT,TRRAP,SMARCC1,MYCBP,TCERG1,PRDM16,TFAP2B,MED17,BCL9L,WWC1,UBE2L3,MED14,MED26,TCF20,TFAP4,PRRX1,TAF4,SUPT7L,JMY,SERTAD2,THRAP3,SP4,MED6,ATXN7L3
magnesium ion binding	molecular_function	522	110	21	1.10578e-11	CSNK1G3,ATP9A,NUDT4,SIK3,ATP8A2,IMPAD1,ATP8B2,CCDC92,NUDT12,ATP11C,NIPAL4,ATP2C1,ROCK1,MYLK,ATP2B2,KCNMA1,RHOA,ATP2B1,ATP2B4,MAP3K3,TTN,RPS6KA3,MAP3K5,WNK1,ADCY6,ROCK2,TGFBR1,PRKAA1,PTEN,NEK6,ACVR1B,ACVR2B,GRIN2B,ACSL1,ADK,ENO1,KALRN,NSF,ATP8B1,TNNI3K,BMPR2,NUAK1,ACVR1,DICER1,FOXK2,MARK1,MAT2A,GRIN2D,SNRK,RPS6KA1,MAP3K1,STK4,LATS2,ACSL3,PDP1,MAP2K5,ATP8A1,ATP11A,BMPR1B,REV1,PPM1B,PPM1K,ACVR2A,MAP…
actin binding	molecular_function	375	86	22	2.17666e-11	PHACTR2,MYO16,DAAM2,KLHL3,KLHL5,SYNPO2L,MYO19,FHDC1,MTSS1L,MYLK,KCNMA1,SLC4A1,AQP2,CFL1,VASP,MARCKS,DMD,PDLIM5,AFAP1,EPB41,MYO1C,WASF2,DBN1,TNS1,HOMER2,VCL,MAEA,YWHAG,TAGLN,MKL2,EPB49,EPB41L3,MSN,MYO10,MYH10,DIAPH2,SPTB,WIPF1,MYO7A,RDX,PARVA,PPP1R9B,PFN1,WASF1,ENAH,WHAMM,KLHL2,YWHAH,CORO1C,MTSS1,ADD3,MACF1,MAP1B,TPM3,ARPC1B,SYN1,SORBS1,LCP1,SSH1,GMFB,MAP1A,IQGAP2,SYNE2,AVIL,ABLIM1,PPP1R9A,MYO5B,M…
protein domain specific binding	molecular_function	217	59	27	2.58896e-11	SHC4,SRC,RHOA,CASP2,IRS1,CEBPA,PTPN11,CTNND1,TJP1,ESRRA,TACC2,PPARA,SIRT1,PIK3R1,BMP2,CACNA1C,IRS2,TGM2,THRA,SCAMP1,GRB2,ITGA3,CD2AP,HAND2,VCP,YWHAG,RARA,ETV6,CCNG1,PPP5C,TNFAIP1,YWHAB,MECP2,ZNF521,YWHAZ,CHMP2B,MAP1LC3B,KPNB1,STXBP1,MYO7A,PARVA,TACC1,POU2F2,PDE4D,RGS6,RFC1,YWHAH,GRIA1,YWHAE,RAP2B,CALM1,TUBA1A,CALM3,TBL1X,AKAP2,HPCAL4,CRIPT,IPCEF1,DLGAP2

## Sheet: SignalingPathways
Table S7. Enriched categories of the top 25 Signaling Pathways
Signaling Pathways	# Genome annotation	Overlap of gene annotation with genome annotation	Percent Overlap	p-value	Overlapping Genes
Actin Cytoskeleton Regulation	548	176	32	3.10477e-16	RAPGEFL1,ARPM1,SHC4,MAPK14,MAPK1,MAP2K1,RAC1,TGFA,ROCK1,SRC,CTTN,CFL1,VASP,CDC42,SOS1,GNA13,LYN,HBEGF,MARCKS,RHOA,CTGF,S1PR2,PAK1,FGF7,DMD,MAP3K3,PPP1CA,PDLIM5,RPS6KA3,FGFR1,MAP3K5,SHC1,FLT1,TIAM1,ROCK2,EPB41,ANK2,RASA1,PIK3R1,PTEN,ERBB4,CNR1,KIT,EZR,RAPGEF4,WASF2,FGF5,KRAS,KITLG,PIK3CA,PPP1R12A,ACTB,OPRK1,FGFR3,FYN,AHNAK,ERBB3,DBN1,GRB2,ITGA3,EREG,KALRN,CD2AP,CSF1R,CYR61,FIGF,RAP1A,VCL,LDB3,PDGF…
NTRK -> AP-1/CREB/ELK-SRF/MYC/SMAD3/TP53 signaling	95	45	47	7.75247e-11	MAPK14,FOS,PRKCA,MAPK1,MAP2K1,RAC1,JUN,SRC,PRKCE,TP53,PRKCD,CDC42,SOS1,IRS1,MAP2K4,PAK1,ITPR1,SRF,RPS6KA3,SHC1,BDNF,CREB1,PLCG1,PIK3R1,IRS2,KRAS,PIK3CA,PDPK1,GRB2,NTRK2,MAPK10,MAP2K3,RALA,NTRK3,RPS6KA1,MAP3K1,RRAS2,PKN2,MAP2K7,ELK1,MAP3K11,PIK3R3,MRAS,PIK3C2B,PIK3C2A
Gonadotrope Cell Activation	722	197	27	2.24395e-10	CACNB1,STXBP5L,RAPGEFL1,CACNA2D4,PLCXD3,SHC4,MAPK14,FOS,PRKCA,MAPK1,MAP2K1,RAC1,TGFA,JUN,SRC,ADM,MMP2,PRKCE,PRKCD,ETS1,TAC3,CDC42,SOS1,LYN,HBEGF,NFAT5,MAP2K4,CTGF,PAK1,FGF7,CEBPA,MAP3K3,ADCYAP1,ITPR1,SRF,RPS6KA3,DDIT3,FGFR1,MAP3K5,EGR1,SHC1,CAMK2G,FLT1,EDNRA,ADCY6,CHP,TIAM1,GNAQ,SNAP25,MMP14,CREB1,SNAP23,PLCG1,PTGS1,RASA1,EDN3,GATA6,CEBPD,CACNA1C,CTSB,ERBB4,KIT,RAPGEF4,FGF5,KRAS,KITLG,GOPC,APLN,F…
FGFR -> AP-1/CREB/CREBBP/ELK-SRF/MYC signaling	98	44	44	1.09365e-09	MAPK14,FOS,PRKCA,MAPK1,MAP2K1,RAC1,JUN,SRC,PRKCE,PRKCD,CDC42,SOS1,MAP2K4,PAK1,FGF7,ITPR1,SRF,RPS6KA3,FGFR1,SHC1,CREB1,PLCG1,PIK3R1,FGF5,KRAS,PIK3CA,PDPK1,CREBBP,GRB2,MAPK10,MAP2K3,RALA,RPS6KA1,MAP3K1,RRAS2,FGF9,PKN2,MAP2K7,ELK1,MAP3K11,PIK3R3,MRAS,PIK3C2B,PIK3C2A
EGFR -> AP-1/CREB/ELK-SRF/MYC signaling	93	42	45	2.10988e-09	MAPK14,FOS,PRKCA,MAPK1,MAP2K1,RAC1,TGFA,JUN,SRC,PRKCE,PRKCD,CDC42,SOS1,HBEGF,MAP2K4,PAK1,ITPR1,SRF,RPS6KA3,SHC1,CREB1,PLCG1,PIK3R1,KRAS,PIK3CA,PDPK1,GRB2,EREG,MAPK10,MAP2K3,RALA,RPS6KA1,MAP3K1,RRAS2,PKN2,MAP2K7,ELK1,MAP3K11,PIK3R3,MRAS,PIK3C2B,PIK3C2A
ThrombopoietinR -> AP-1/CREB/ELK-SRF/MYC signaling	85	39	45	4.5652e-09	MAPK14,FOS,PRKCA,MAPK1,MAP2K1,RAC1,JUN,SRC,PRKCE,PRKCD,CDC42,SOS1,MAP2K4,PAK1,ITPR1,SRF,RPS6KA3,SHC1,CREB1,PLCG1,PIK3R1,KRAS,PIK3CA,PDPK1,GRB2,MAPK10,MAP2K3,RALA,RPS6KA1,MAP3K1,RRAS2,PKN2,MAP2K7,ELK1,MAP3K11,PIK3R3,MRAS,PIK3C2B,PIK3C2A
ThrombinR -> AP-1/CREB/ELK-SRF/SP1 signaling	110	46	41	7.57541e-09	PLCXD3,MAPK14,FOS,PRKCA,MAPK1,MAP2K1,RAC1,JUN,SRC,PRKCE,PRKCD,CDC42,SOS1,GNA13,RHOA,MAP2K4,ITPR1,SRF,RPS6KA3,SHC1,GNAQ,CREB1,PLCG1,PIK3R1,SP1,KRAS,PIK3CA,PDPK1,GRB2,MAPK10,MAP2K3,RALA,RPS6KA1,MAP3K1,RRAS2,PLCB4,PKN2,MAP2K7,ELK1,ARHGEF7,MAP3K11,PIK3R3,MRAS,PIK3C2B,PLCL2,PIK3C2A
VEGFR -> AP-1/CREB/MYC signaling	87	39	44	1.03264e-08	MAPK14,FOS,PRKCA,MAPK1,MAP2K1,RAC1,JUN,SRC,PRKCE,PRKCD,CDC42,SOS1,MAP2K4,PAK1,ITPR1,RPS6KA3,SHC1,FLT1,CREB1,PLCG1,PIK3R1,KRAS,PIK3CA,PDPK1,GRB2,FIGF,MAPK10,MAP2K3,RALA,RPS6KA1,MAP3K1,RRAS2,PKN2,MAP2K7,MAP3K11,PIK3R3,MRAS,PIK3C2B,PIK3C2A
FibronectinR -> AP-1/ELK-SRF/SREBF signaling	104	44	42	1.05059e-08	MAPK14,FOS,PRKCA,MAPK1,MAP2K1,RAC1,JUN,SRC,PRKCE,PRKCD,CDC42,SOS1,PTK2,MAP2K4,PAK1,ITPR1,SRF,FN1,SHC1,PLCG1,PIK3R1,KRAS,PIK3CA,PDPK1,GRB2,ITGA3,RAP1A,ITGA6,MAPK10,MAP2K3,RALA,MAP3K1,RRAS2,PKN2,DOCK1,MAP2K7,ELK1,MAP3K11,PIK3R3,MRAS,PIK3C2B,PIK3C2A,RAPGEF1,ITGA10
EphrinR -> actin signaling	216	74	34	1.11935e-08	ARPM1,ROCK1,CTTN,CFL1,VASP,MARCKS,RHOA,DMD,PDLIM5,ROCK2,EPB41,ANK2,EZR,WASF2,ACTB,AHNAK,DBN1,KALRN,CD2AP,VCL,LDB3,SDC2,TAGLN,EPHA4,EPB49,EPB41L3,LIMK1,PLEK,ODF1,MSN,EFNB2,MYH10,GRLF1,WIPF1,SEPT9,RDX,PPP1R9B,FERMT2,PFN1,WASF1,EFNA5,ENAH,KLHL2,CORO1C,MTSS1,ADD3,MACF1,TPM3,ARPC1B,CIT,EFNB3,SORBS1,LCP1,MAP1A,SORBS3,MLLT4,AVIL,ABLIM1,ACTC1,ANK1,SHANK2,MYRIP,CDC42EP3,EPB41L2,EFNA3,NEBL,WIPF2,TLN2,SSX2I…
HGFR -> AP-1/CREB/MYC signaling	82	37	45	1.99134e-08	MAPK14,FOS,PRKCA,MAPK1,MAP2K1,RAC1,JUN,SRC,PRKCE,PRKCD,CDC42,SOS1,MAP2K4,PAK1,ITPR1,RPS6KA3,SHC1,CREB1,PLCG1,PIK3R1,KRAS,PIK3CA,PDPK1,GRB2,MAPK10,MAP2K3,RALA,RPS6KA1,MAP3K1,RRAS2,PKN2,MAP2K7,MAP3K11,PIK3R3,MRAS,PIK3C2B,PIK3C2A
PDGFR -> AP-1/MYC signaling	77	35	45	3.8275e-08	MAPK14,FOS,PRKCA,MAPK1,MAP2K1,RAC1,JUN,SRC,PRKCE,PRKCD,CDC42,SOS1,MAP2K4,PAK1,ITPR1,SHC1,PLCG1,PIK3R1,KRAS,PIK3CA,PDPK1,GRB2,PDGFRA,MAPK10,MAP2K3,RALA,MAP3K1,RRAS2,PKN2,MAP2K7,MAP3K11,PIK3R3,MRAS,PIK3C2B,PIK3C2A
EGFR/ERBB3 -> MEF/MYOD/NFATC/MYOG signaling	130	50	38	4.63266e-08	PLCXD3,MAPK14,PRKCA,RAC1,TGFA,SRC,MYOD1,PRKCE,PRKCD,CDC42,HBEGF,PAK1,MAP3K3,ITPR1,MYOG,CHP,EP300,PLCG1,PIK3R1,PIK3CA,KAT2B,ERBB3,PDPK1,GRB2,EREG,PPP3CA,MEF2C,MAP2K3,MAP3K1,HDAC9,HDAC3,HDAC7,MAP2K5,CAMKK2,PLCB4,HDAC4,MEF2D,PAK2,PKN2,PPP3R1,CAMKK1,PIK3R3,SENP3,PIK3C2B,PLCL2,PIK3C2A,CALM1,CALM3,MYLK4,CALML4
Focal Adhesion Regulation	322	98	30	5.07284e-08	SHC4,MAPK14,PRKCA,MAPK1,MAP2K1,RAC1,TGFA,SRC,PRKCE,PRKCD,VASP,CDC42,SOS1,LYN,HBEGF,RHOA,PTK2,CTGF,PAK1,FGF7,MAP3K3,FGFR1,MAP3K5,SHC1,FLT1,TIAM1,RASA1,PIK3R1,PTEN,ERBB4,KIT,FGF5,KRAS,KITLG,PIK3CA,FGFR3,FYN,ERBB3,TNS1,GRB2,ITK,ITGA3,EREG,CSF1R,CYR61,FIGF,VCL,PDGFRA,ITGA6,MAP2K3,RALA,MAP3K1,RHOC,GIT1,DUSP5,RRAS2,NF1,PPP5C,GRLF1,PPM1B,FGF9,PARVA,VAV3,PAK2,PKN2,DOCK1,ENAH,TAB2,DUSP16,ZAK,DUSP10,CRKL,T…
EGFR -> AP-1/ATF2 signaling	82	36	43	7.40185e-08	MAPK14,FOS,PRKCA,MAPK1,MAP2K1,RAC1,TGFA,JUN,SRC,PRKCE,PRKCD,CDC42,SOS1,HBEGF,MAP2K4,ITPR1,SHC1,PLCG1,PIK3R1,KRAS,PIK3CA,PDPK1,GRB2,ITK,EREG,MAPK10,MAP2K3,RALA,MAP3K1,RRAS2,PKN2,MAP2K7,PIK3R3,MRAS,PIK3C2B,PIK3C2A
TNFRSF1A -> AP-1/ATF/TP53 signaling	36	21	58	1.00634e-07	MAPK14,FOS,MAPK1,MAP2K1,JUN,TNF,TP53,SOS1,MAP2K4,MAP3K5,KRAS,GRB2,MAPK10,MAP2K3,RALA,MAP3K1,LTB,RRAS2,MAP2K7,MRAS,MAP3K14
VasopressinR1 -> CREB/ELK-SRF/AP-1/EGR signaling	108	43	39	1.2921e-07	PLCXD3,MAPK14,FOS,PRKCA,MAPK1,MAP2K1,RAC1,JUN,SRC,PRKCE,PRKCD,CDC42,SOS1,MAP2K4,ITPR1,SRF,RPS6KA3,EGR1,SHC1,GNAQ,CREB1,PLCG1,PIK3R1,KRAS,PIK3CA,PDPK1,GRB2,MAPK10,MAP2K3,RALA,RPS6KA1,MAP3K1,RRAS2,PLCB4,PKN2,MAP2K7,ELK1,MAP3K11,PIK3R3,MRAS,PIK3C2B,PLCL2,PIK3C2A
T Cell Activation	951	233	24	1.77868e-07	STXBP5L,MYO16,ARPM1,PLCXD3,SHC4,PRKCA,MAPK1,MAP2K1,RAC1,ROCK1,SRC,MYLK,TNF,CTTN,PRKCE,PRKCD,ETS1,CFL1,VASP,CDC42,SOS1,LYN,MARCKS,RHOA,NFAT5,PAK1,DMD,LEP,MAP3K3,PPP1CA,PDLIM5,ITPR1,RPS6KA3,CD4,MAP3K5,EGR1,SHC1,CAMK2G,CHP,LIF,TIAM1,ROCK2,SNAP25,CD28,CREB1,EPB41,SNAP23,MYO1C,PLCG1,PTGS1,ANK2,RASA1,SP3,PIK3R1,SP1,PTEN,EZR,WASF2,KRAS,PIK3CA,YY1,PPP1R12A,TNFSF4,GOPC,ACTB,FYN,SYT7,SCAMP1,AHNAK,FURIN,PDP…
EGFR/ERBB2 -> TP53 signaling	81	35	43	1.81783e-07	MAPK14,PRKCA,MAPK1,MAP2K1,RAC1,TGFA,SRC,PRKCE,TP53,PRKCD,CDC42,SOS1,HBEGF,MAP2K4,ITPR1,SHC1,PLCG1,PIK3R1,KRAS,PIK3CA,PDPK1,GRB2,ITK,EREG,MAPK10,MAP2K3,RALA,MAP3K1,RRAS2,PKN2,MAP2K7,PIK3R3,MRAS,PIK3C2B,PIK3C2A
VasopressinR1 -> MEF/MYOD/NFATC/MYOG signaling	125	47	37	2.61059e-07	PLCXD3,MAPK14,PRKCA,RAC1,SRC,MYOD1,PRKCE,PRKCD,CDC42,PAK1,MAP3K3,ITPR1,MYOG,CHP,GNAQ,EP300,PLCG1,PIK3R1,PIK3CA,KAT2B,PDPK1,GRB2,PPP3CA,MEF2C,MAP2K3,MAP3K1,HDAC9,HDAC3,HDAC7,MAP2K5,CAMKK2,PLCB4,HDAC4,MEF2D,PAK2,PKN2,PPP3R1,CAMKK1,PIK3R3,SENP3,PIK3C2B,PLCL2,PIK3C2A,CALM1,CALM3,MYLK4,CALML4
IGF1R -> MEF/MYOD/MYOG signaling	62	29	46	2.64917e-07	MAPK14,PRKCA,RAC1,SRC,MYOD1,PRKCE,PRKCD,CDC42,IRS1,PAK1,MAP3K3,MYOG,EP300,IGF1R,PIK3R1,PIK3CA,KAT2B,PDPK1,MEF2C,MAP2K3,MAP3K1,MAP2K5,MEF2D,PAK2,PKN2,PIK3R3,SENP3,PIK3C2B,PIK3C2A
EndothelinRa -> AP-1/CREB signaling	66	30	45	3.60912e-07	MAPK14,FOS,PRKCA,MAPK1,MAP2K1,JUN,PRKCE,PRKCD,CDC42,RHOA,MAP2K4,PAK1,ITPR1,RPS6KA3,EDNRA,CREB1,EDN3,KRAS,MAPK10,MAP2K3,RALA,RPS6KA1,MAP3K1,RRAS2,PKN2,MAP2K7,MAP3K11,MRAS,MAP3K14,FARP1
VasopressinR2 -> MEF/MYOD/NFATC/MYOG signaling	123	46	37	4.2007e-07	PLCXD3,MAPK14,PRKCA,RAC1,SRC,MYOD1,PRKCE,PRKCD,CDC42,PAK1,MAP3K3,ITPR1,MYOG,CHP,EP300,PLCG1,PIK3R1,PIK3CA,KAT2B,PDPK1,GRB2,PPP3CA,MEF2C,MAP2K3,MAP3K1,HDAC9,HDAC3,HDAC7,MAP2K5,CAMKK2,PLCB4,HDAC4,MEF2D,PAK2,PKN2,PPP3R1,CAMKK1,PIK3R3,SENP3,PIK3C2B,PLCL2,PIK3C2A,CALM1,CALM3,MYLK4,CALML4
ErythropoietinR -> AP-1/CREB/MYC signaling	80	34	42	4.39368e-07	MAPK14,FOS,PRKCA,MAPK1,MAP2K1,RAC1,JUN,SRC,PRKCE,PRKCD,CDC42,MAP2K4,PAK1,ITPR1,RPS6KA3,CREB1,PLCG1,PIK3R1,KRAS,PIK3CA,PDPK1,MAPK10,MAP2K3,RALA,RPS6KA1,MAP3K1,RRAS2,PKN2,MAP2K7,MAP3K11,PIK3R3,MRAS,PIK3C2B,PIK3C2A
VasopressinR2 -> CREB/ELK-SRF/AP-1/EGR signaling	128	47	36	5.88122e-07	PLCXD3,MAPK14,FOS,PRKCA,MAPK1,MAP2K1,RAC1,JUN,SRC,PRKCE,PRKCD,CDC42,SOS1,MAP2K4,ITPR1,SRF,RPS6KA3,EGR1,SHC1,ADCY6,CREB1,PLCG1,PIK3R1,KRAS,PIK3CA,PDPK1,GRB2,RAP1A,MAPK10,MAP2K3,RALA,RPS6KA1,MAP3K1,RRAS2,PRKAR1A,PLCB4,PKN2,MAP2K7,ADCY1,ELK1,MAP3K11,PIK3R3,ADCY9,MRAS,PIK3C2B,PLCL2,PIK3C2A

## Sheet: metabolicpathways
Table S7. Enriched categories of the significant Metabolic Pathways
Matabolic Pathways	# Genome annotation	Overlap of gene annotation with genome annotation	Percent Overlap	p-value	Overlapping Genes
Metabolism of glycerophospholipids and ether lipids	372	54	14	2.64607e-09	LPPR4,CTDSPL2,AGPAT4,LPPR2,ZDHHC18,MBOAT2,MBOAT1,PLCXD3,GPAM,PLCG1,MLL,LPIN1,LCLAT1,LYPLA1,WHSC1,GPD2,PLCB4,PAFAH1B1,PPAP2B,AGPAT1,SACM1L,LPCAT1,SETD7,GPD1L,DGKG,NAA20,PCYT1B,ZDHHC7,ZDHHC17,PLCL2,CDIPT,WHSC1L1,MLL2,ETNK1,LPIN3,NAT8L,ZDHHC3,MLL3,MTMR2,EPT1,ASH1L,ZDHHC16,CDS2,SUV420H1,SAMHD1,LPGAT1,ZDHHC5,ZDHHC9,NT5DC3,DGKI,NAA50,LYPLA2,ETNK2,MTMR7
Sphingolipid metabolism	206	25	12	0.00159255	KDSR,LPPR4,CTDSPL2,LPPR2,GXYLT1,OGT,LPIN1,B4GALT1,PPAP2B,SACM1L,SPTLC2,MGAT5B,LPIN3,MTMR2,ACER2,B3GALT2,SAMHD1,GALNT7,B4GALT5,FUT9,NT5DC3,ACER3,MTMR7,PIGM,ALG9
Metabolism of triacylglycerols	103	15	14	0.00250449	LPPR4,AGPAT4,LPPR2,MBOAT2,GPAM,LPIN1,LCLAT1,LIPG,GPD2,PPAP2B,AGPAT1,GPD1L,DGKG,LPIN3,DGKI
Glycosylphosphatidylinositol(GPI)-anchor biosynthesis	136	18	13	0.00285543	MBLAC2,GXYLT1,OGT,MEST,B4GALT1,DCP1A,NDST1,MGAT5B,DCP2,B3GALT2,OTUD7B,N4BP2,GALNT7,PKDCC,B4GALT5,FUT9,PIGM,ALG9
Pterine biosynthesis	227	22	9	0.0382944	NUDT4,YTHDC2,DDX59,XRCC5,DDX58,SMARCA2,SMARCA1,CHD7,DDX3X,INO80,CHD1,EIF4A1,NAV2,DDX6,SETX,DDX3Y,EIF4A2,DHX40,CHD6,DDX52,HELZ,CHD9
